# Supplementary material for: Interferon-γ signaling is associated with BRCA1 loss-of-function mutations in high grade serous ovarian cancer
Source: PubMed Central journal article supplement (PMC6897992; doi:10.1038/s41698-019-0103-4), 2019-12-06
Supplement: 41698_2019_103_MOESM1_ESM.pdf [file 41698_2019_103_MOESM1_ESM.pdf]

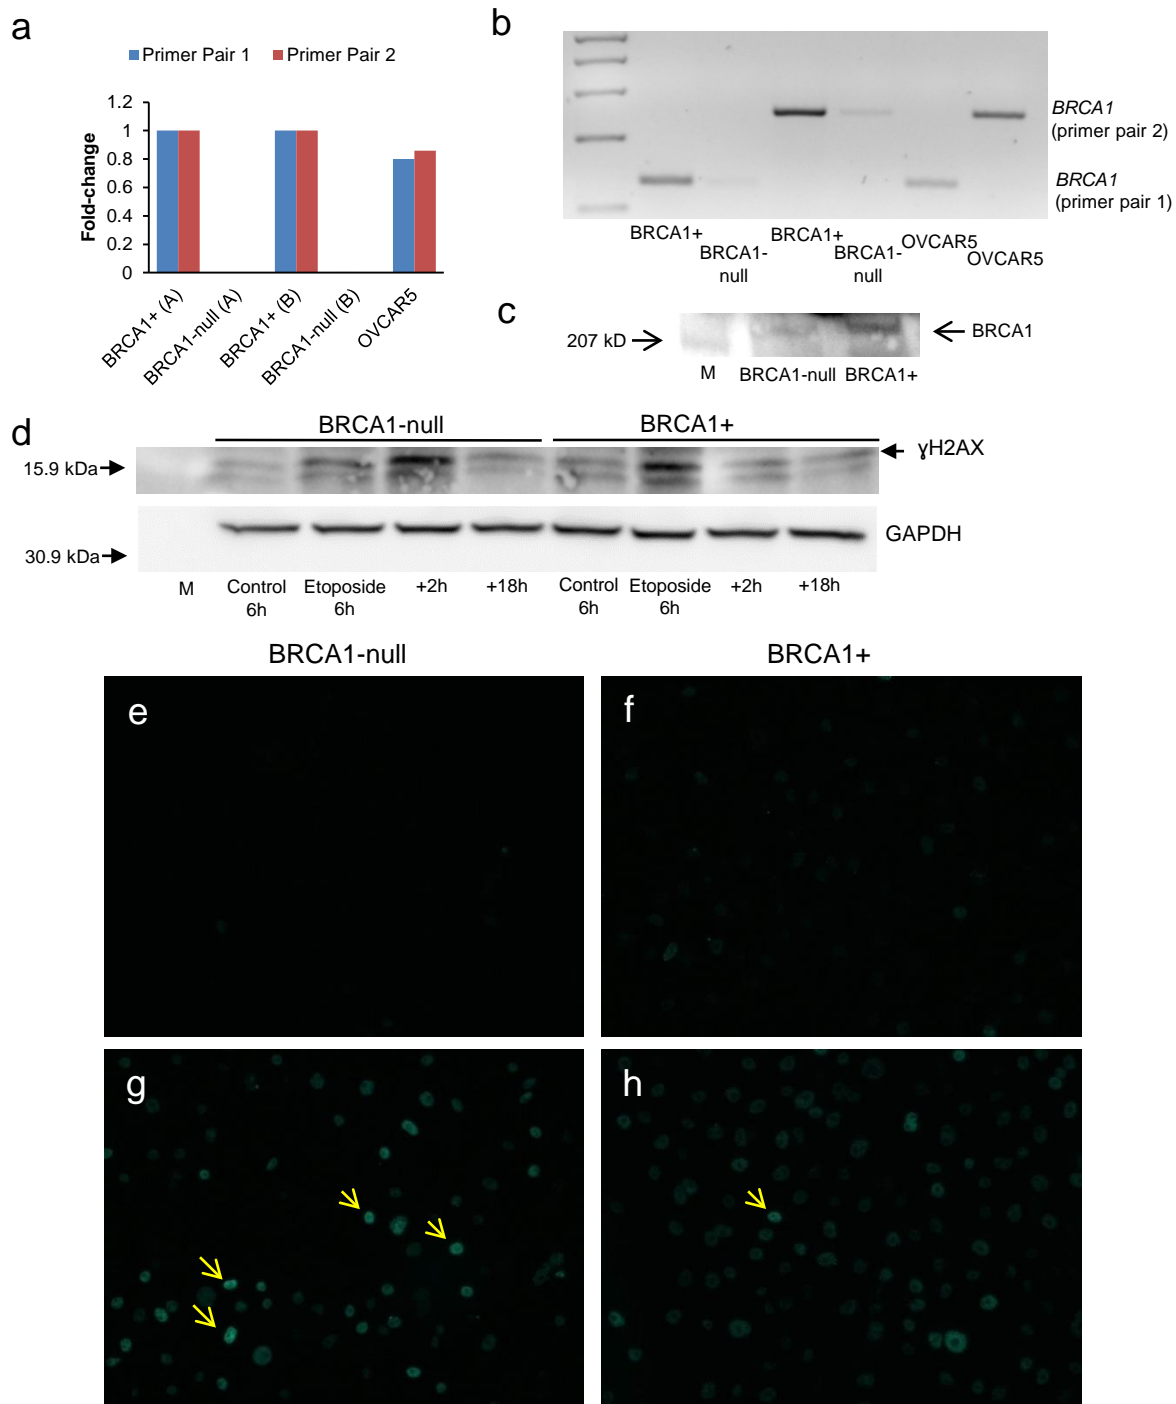

**Supplementary Figure 1. Demonstrations of the 2594delC mutation in the *BRCA1* gene, and dsDNA break repair in *BRCA1*<sup>+</sup> and *BRCA1*-mutated (*BRCA1*-null) UWB1.289 ovarian cancer cells. **a, b.** Amplification of a *BRCA1* mRNA fragment expected to contain the 2594delC mutation in *BRCA1*<sup>+</sup>, *BRCA1*-null (samples A and B were obtained at different times), and OVCAR5 (positive control) cells by real-time (**a**) and regular RT-PCR (**b**). The 3'-end of the forward primer was designed to bind the 2594C nucleotide of the *BRCA1* transcript (absent in *BRCA1*-null), and was paired with 2 different reverse primers. **c.** Western of *BRCA1* in *BRCA1*-null and *BRCA1*<sup>+</sup> cell lines using an antibody targeting the C-terminus. M, protein markers. **d.** Western of γH2AX at the end of etoposide treatment (25 μM for 6h), and at 2h and 18h after etoposide wash-off. M, protein markers. **e, f, g, h.** Immunofluorescence of γH2AX 2h after DMSO (**e, f**) or etoposide (25 μM, 6h, **g, h**) treatment. Arrows point at some cells showing relatively high levels of γH2AX staining.**

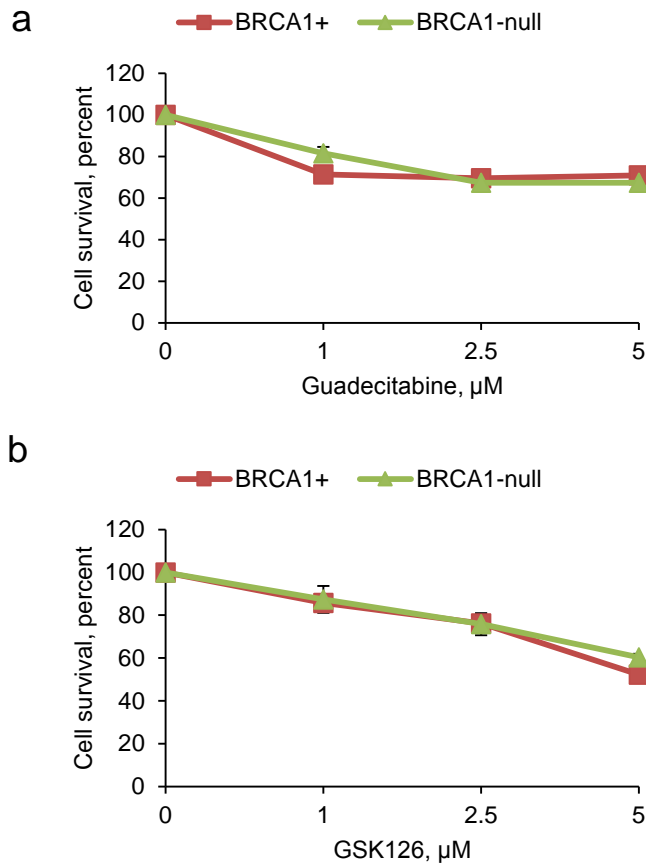

**Supplementary Figure 2. A *BRCA1* loss-of-function mutation does not alter effects of DNA methylation or H3K27 methylation inhibitors on survival of ovarian cancer (OC) cells. a, b.** Survival measured by the CCK8 assay of *BRCA1*-mutated (*BRCA1*-null) and *BRCA1*+ UWB1.289 ovarian cancer cells treated with the DNA methylation inhibitor guadecitabine (**a**), or EZH2 (H3K27 methyltransferase) inhibitor GSK126 (**b**) for 72 hours. Values represent means  $\pm$  s.e.m. (n=3 replicates).

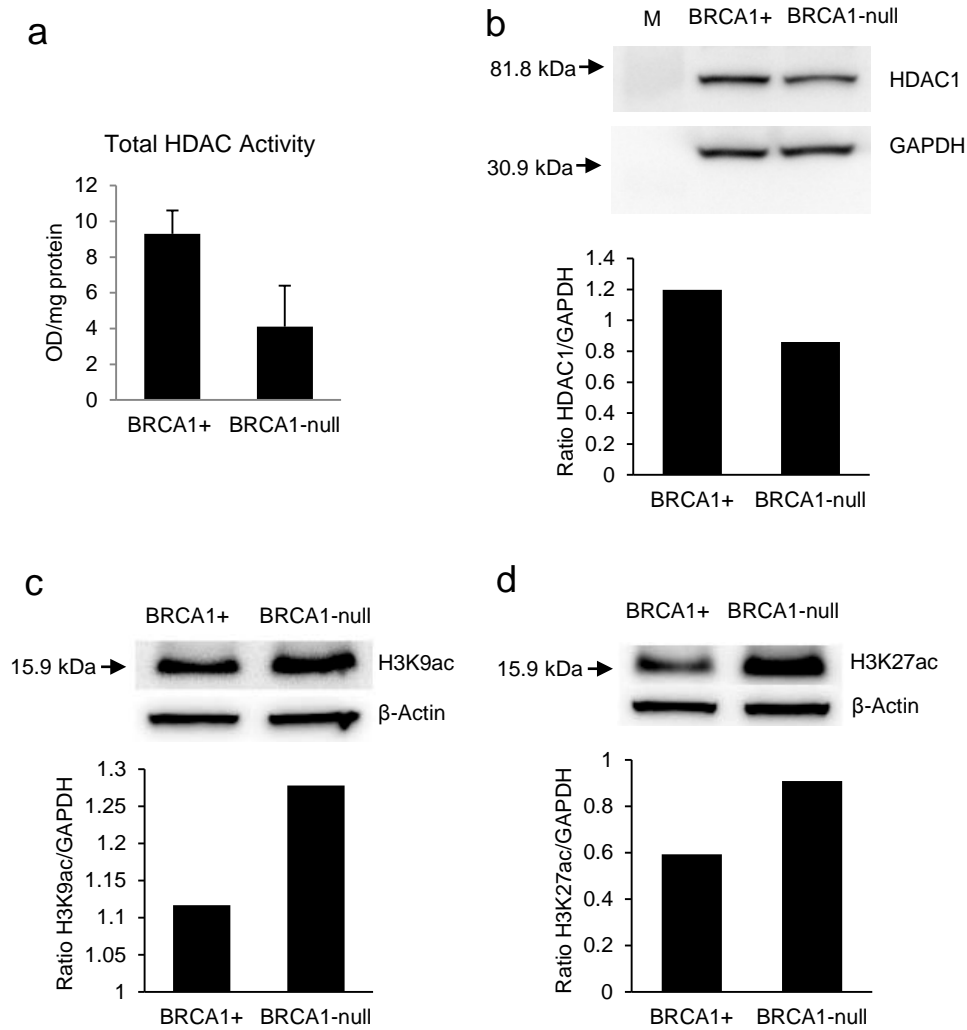

**Supplementary Figure 3. HDAC activity, HDAC1 protein levels, and histone H3 acetylation in BRCA1-mutated (BRCA1-null) and BRCA1+ ovarian cancer cells.** **a.** Total HDAC activity (means  $\pm$  s.e.m.,  $n=2$  replicates). Western blot and results of densitometric analysis of protein bands for HDAC1 (**b**), H3K9ac (**c**), and H3K27ac (**d**). M, protein markers

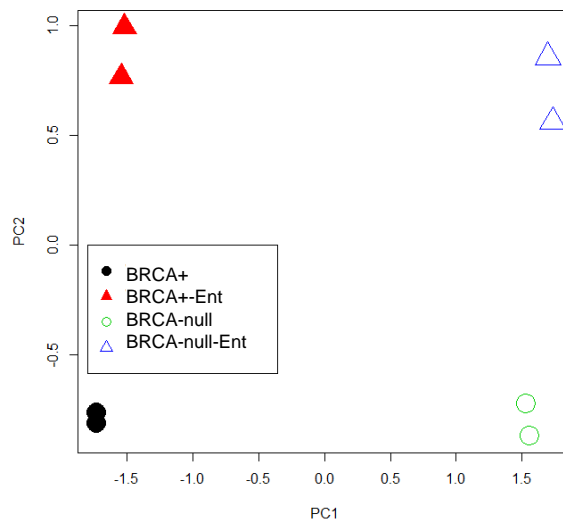

**Supplementary Figure 4.** Principal component analysis of transcriptomic data obtained by RNAseq in BRCA1+ and BRCA1-mutated (BRCA1-null) UWB1.289 ovarian cancer cells treated or not treated with the histone deacetylase (HDAC) inhibitor entinostat (Ent, 0.5  $\mu$ M).

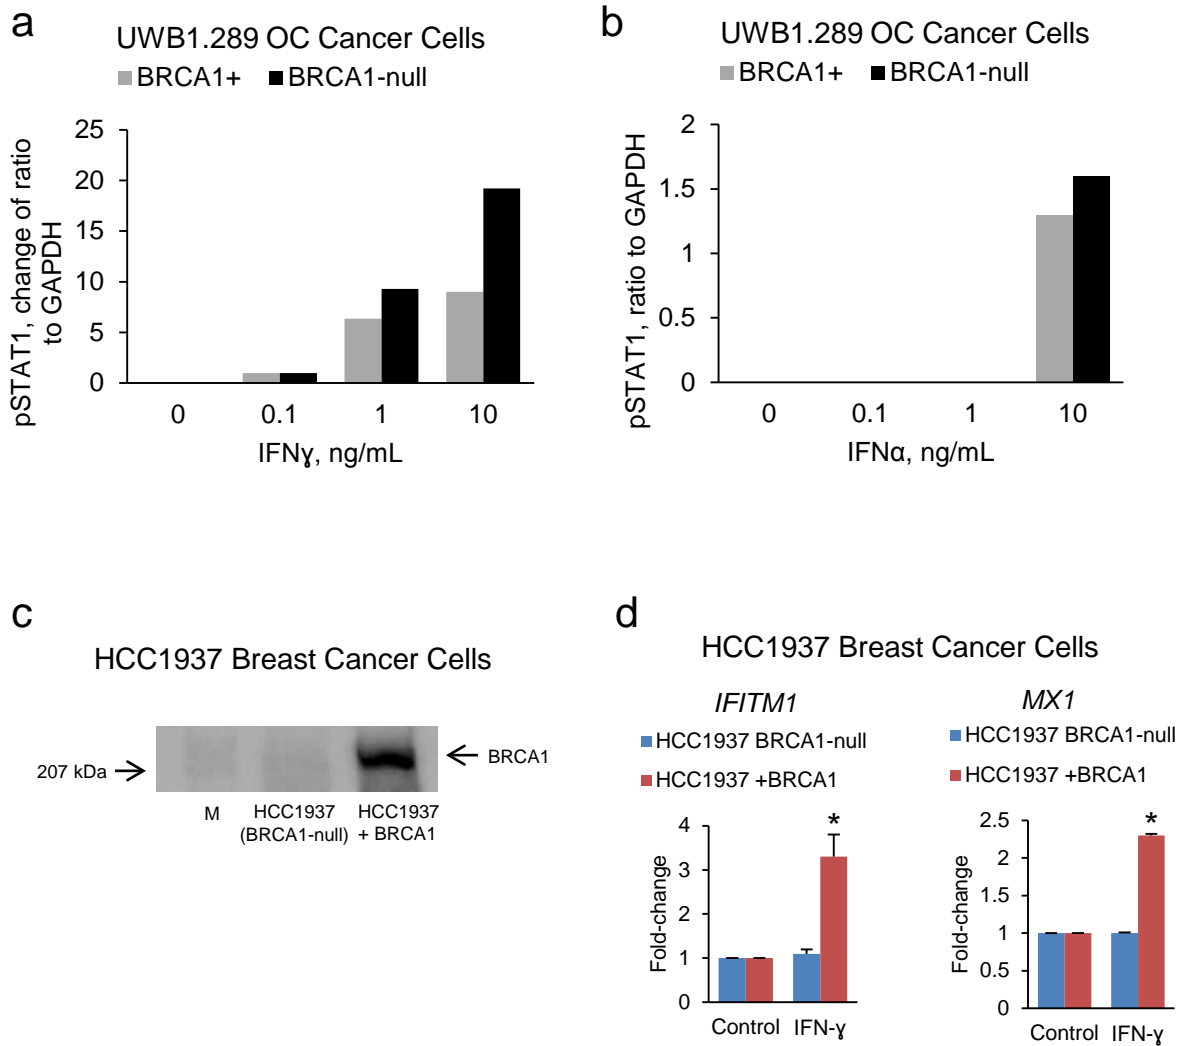

**Supplementary Figure 5. a.** Densitometric analysis of pSTAT1 bands presented in Fig. 3b. **b.** Densitometric analysis of pSTAT1 bands presented in Fig. 3e **c.** Western of BRCA1 in BRCA1-mutated HCC1937 (BRCA1-null) and HCC1937+BRCA1 breast cancer cell line. M, protein markers. **d.** Levels (means  $\pm$  s.e.m.) of *IFITM1* and *MX1* mRNAs measured by qRT-PCR in HCC1937 (BRCA1-null) and in HCC1937+BRCA1 breast cancer cells treated with IFN- $\gamma$  (10 ng/mL) for 24 hours. \* $P$ <0.05 (t-test) relative to control, n=3 replicates.

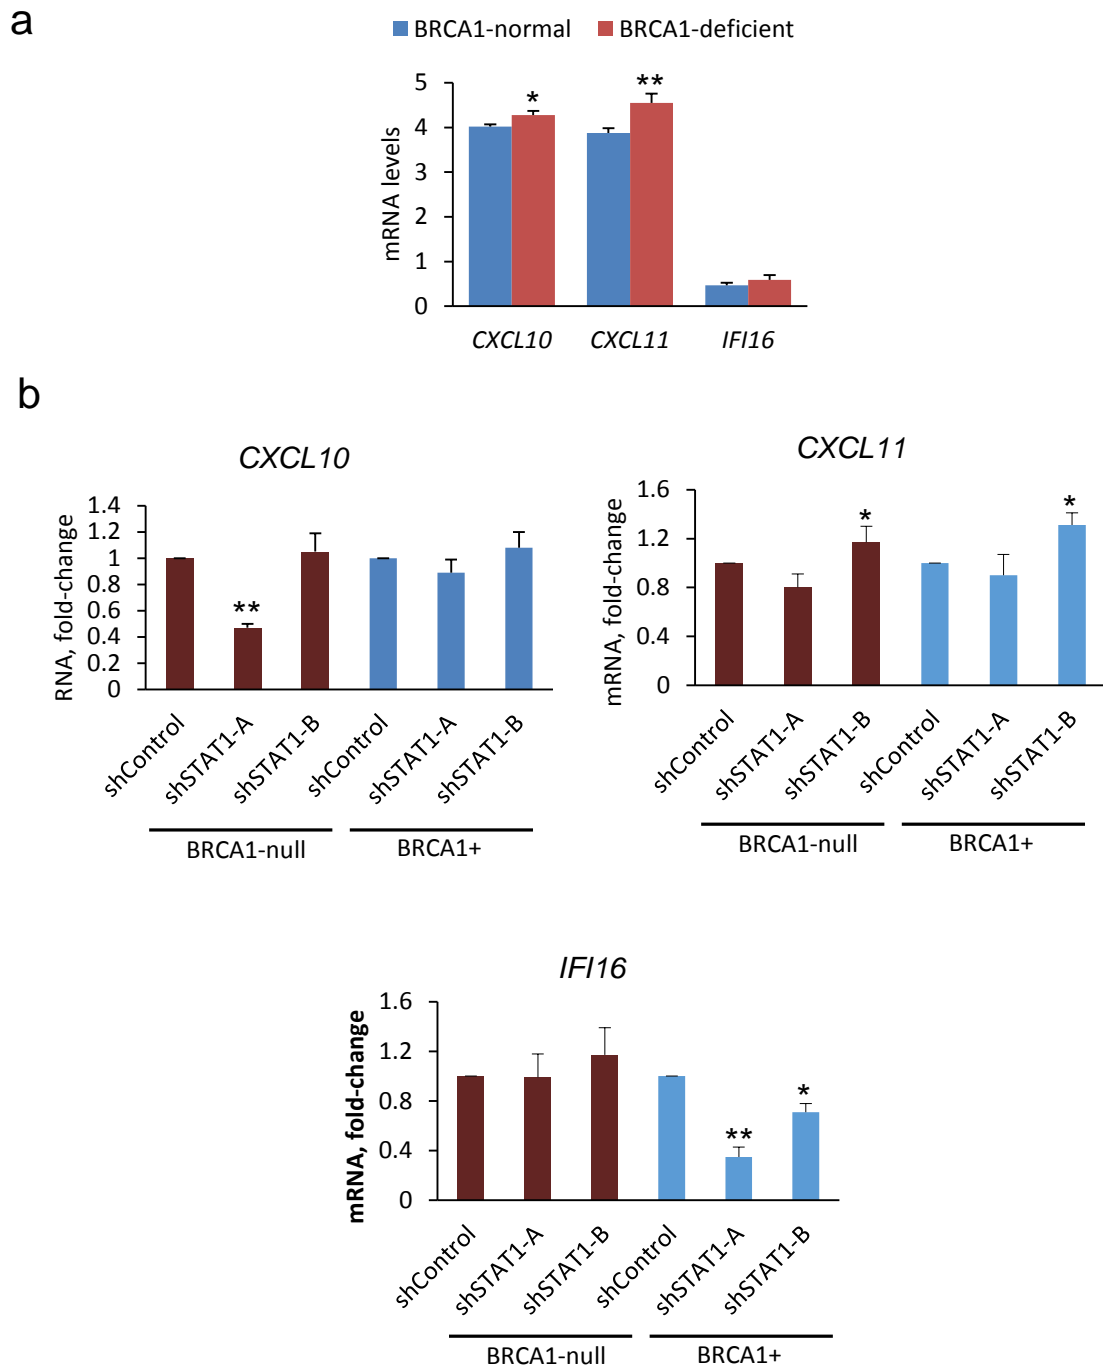

**Supplementary Figure 6.** mRNA levels (means  $\pm$  s.em.) of the IFN- $\gamma$ -regulated genes *CXCL10*, *CXCL11*, and *IFI16* in BRCA1-normal (n=330) and BRCA1-deficient (n=75) ovarian cancer tumors from the TCGA (a), and in BRCA1-null and BRCA1+ UWB1.289 ovarian cancer cells transduced with non-targeting shRNA (shControl) or shRNAs targeting *STAT1* (shSTAT1-A and -B). Values are means  $\pm$  s.em., n=3 replicates (b). \*\*  $P < 0.01$ , \*  $P < 0.05$ , t-test.

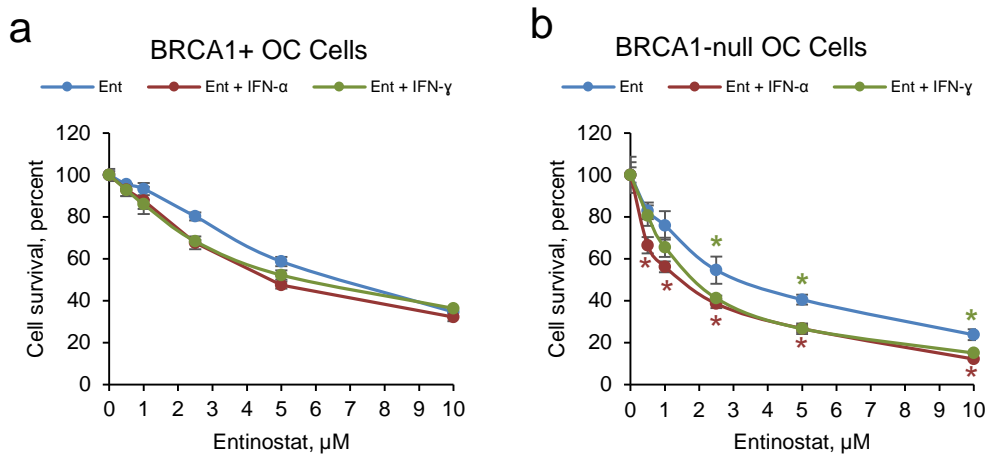

**Supplementary Figure 7. Responses of ovarian cancer (OC) cells to IFN- $\gamma$  depended on BRCA1 mutational status. a, b.** Survival of BRCA1+ (a) and BRCA1-mutated (BRCA1-null) (b) UWB1.289 OC cells treated with the HDAC inhibitor entinostat (Ent), or Ent concomitantly with IFN- $\alpha$  (10 ng/mL) or IFN- $\gamma$  (10 ng/mL) for 72 hours. \* $P < 0.05$  (t-test) relative to Ent alone at the indicated doses. Values are means  $\pm$  s.e.m.,  $n = 4$  replicates.

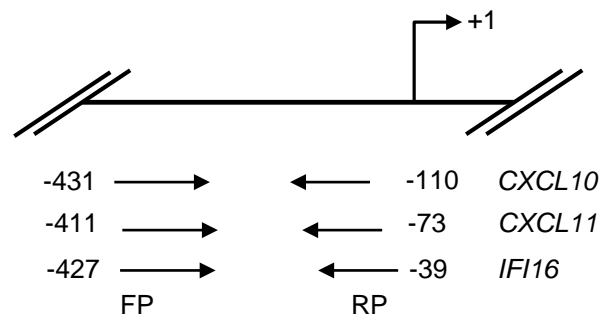

**Supplementary Figure 8.** 5' binding sites relative to TSS (+1) for primers used for PCR amplification of *CXCL10*, *CXCL11*, and *IFI16* promoter fragments after H3K9ac ChIP in the BRCA1-mutated UWB1.289 ovarian cancer cell line transduced with empty vector or vector containing a BRCA1 sequence (data shown in Fig. 5G). FP: forward primer, RP: reverse primer.



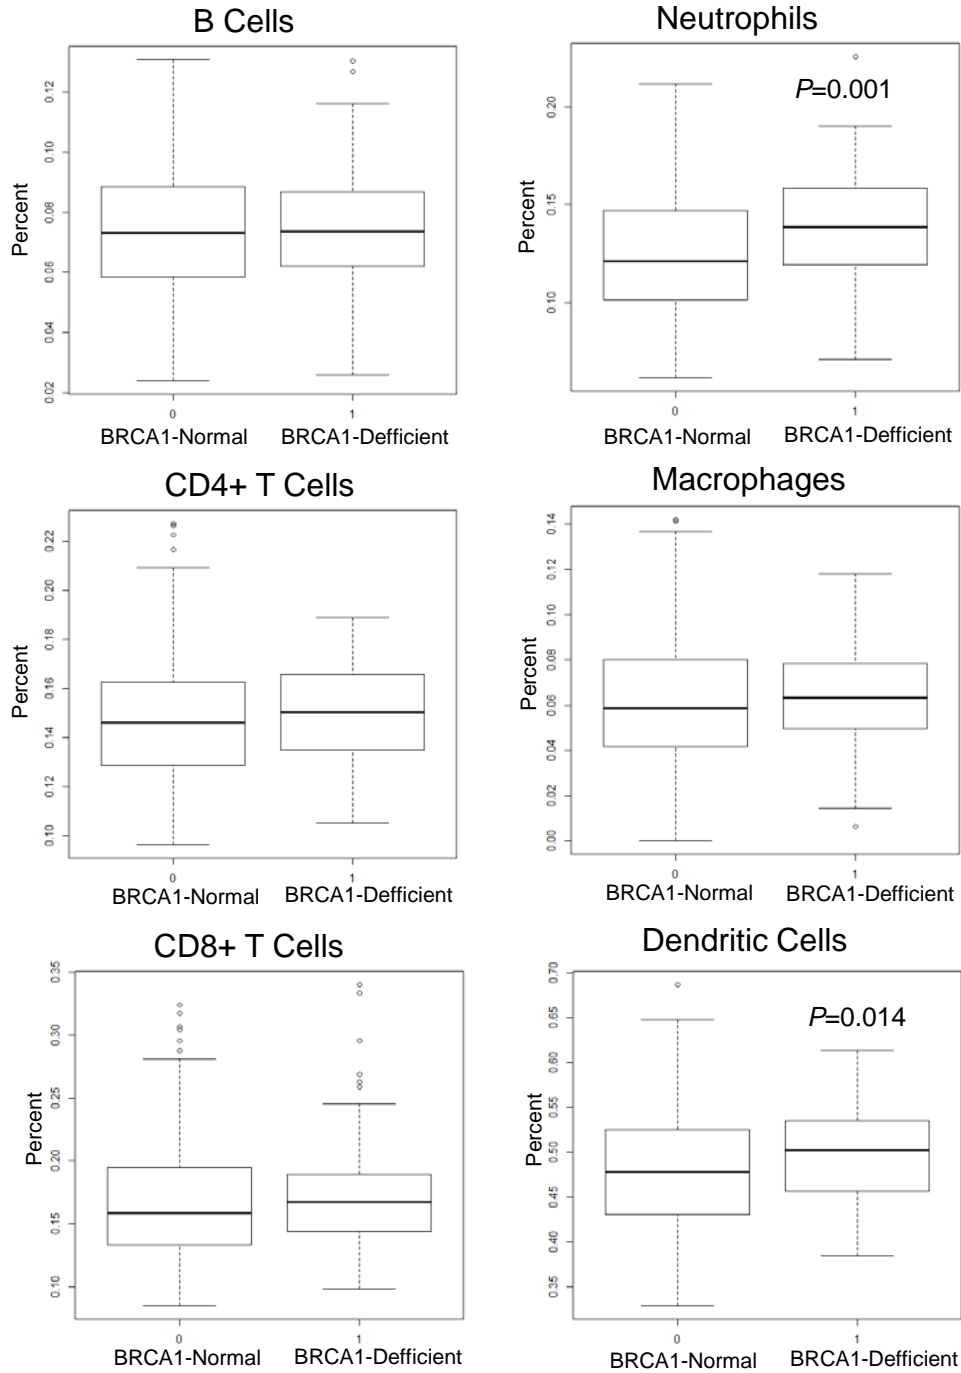

**Supplementary Figure 9. Infiltrating immune cells in ovarian cancer tumors (TCGA).** Proportions of infiltrating immune cells in BRCA1-normal and BRCA1-deficient ovarian cancer tumors (TCGA) determined using the Tumor Immune Information Resource (TIMER). Box plots depict median and 25-75% quartiles, whiskers represent data range. Shown are t-test  $P$ -values.

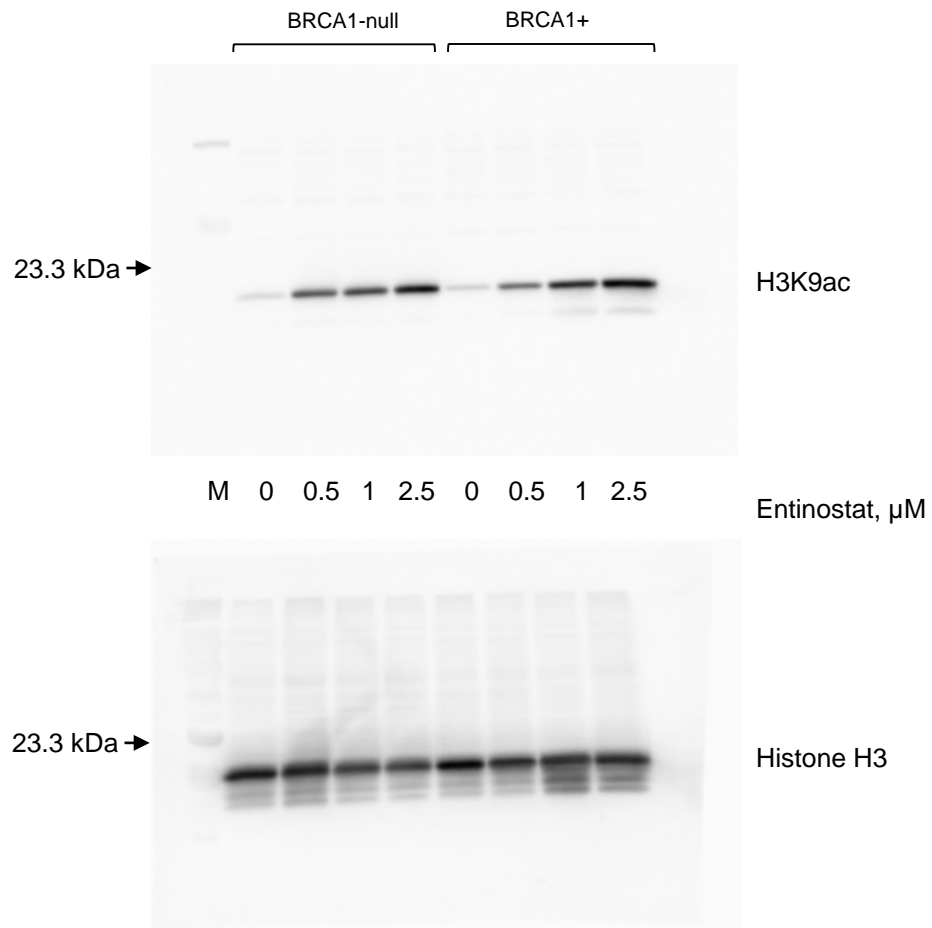

**Supplementary Fig 10.** Images of the whole blots from which the cropped images presented in Figure 1B were obtained. M, protein markers.

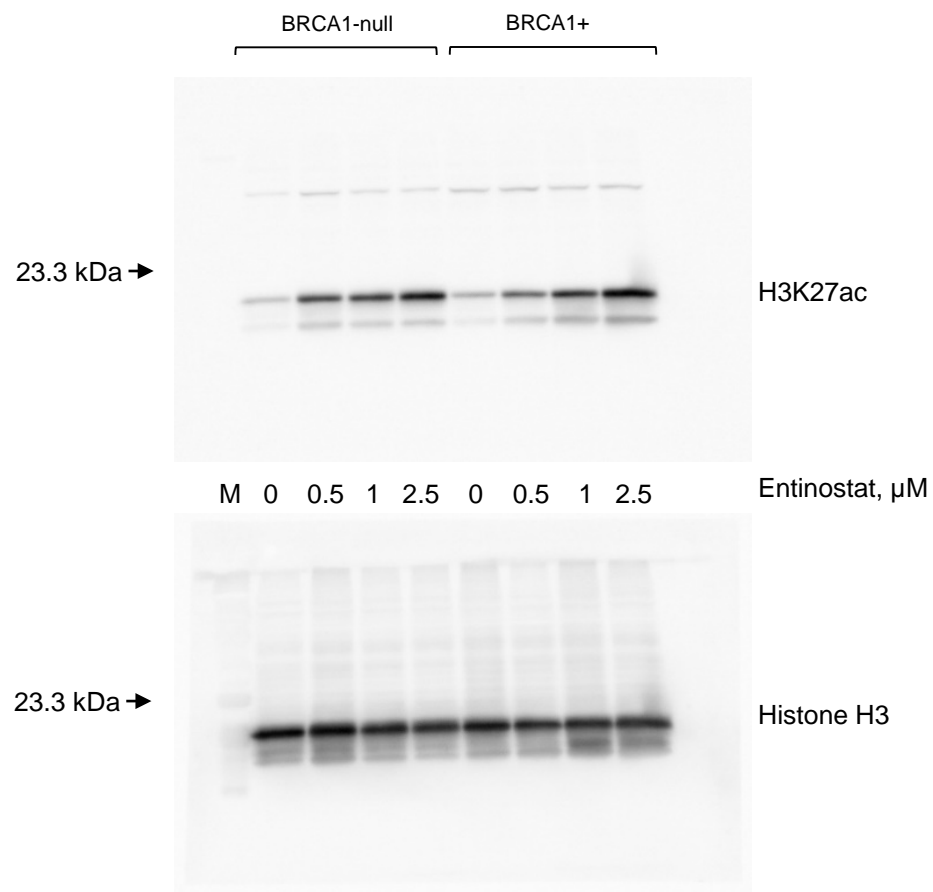

**Supplementary Figure 11.** Images of the whole blots from which the cropped images presented in Figure 1C were obtained. M, protein markers.

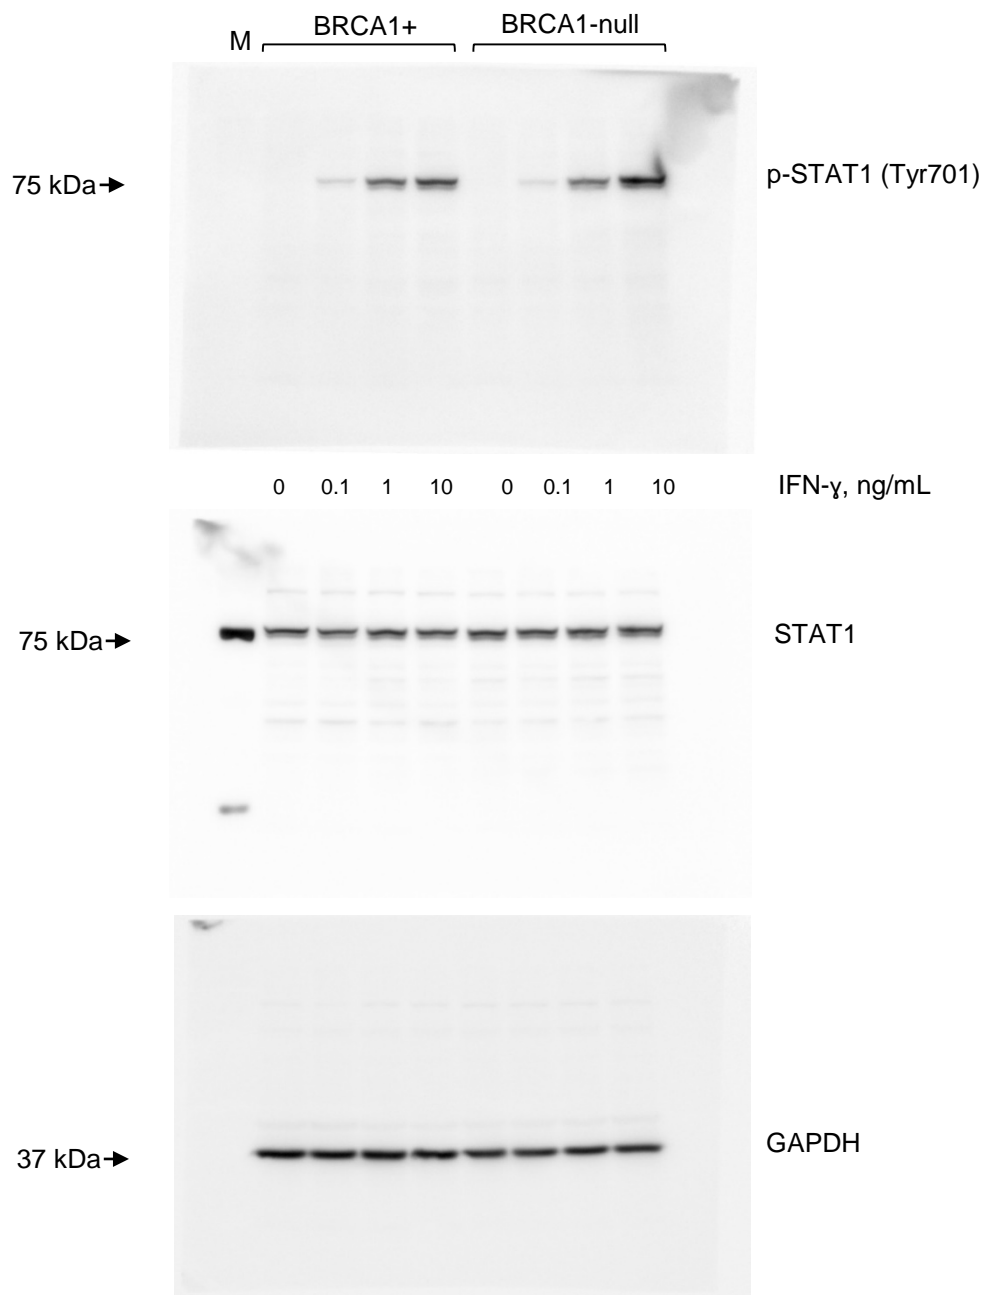

**Supplementary Figure 12.** Images of the whole blots from which the cropped images presented in Figure 3B were obtained. M, protein markers.

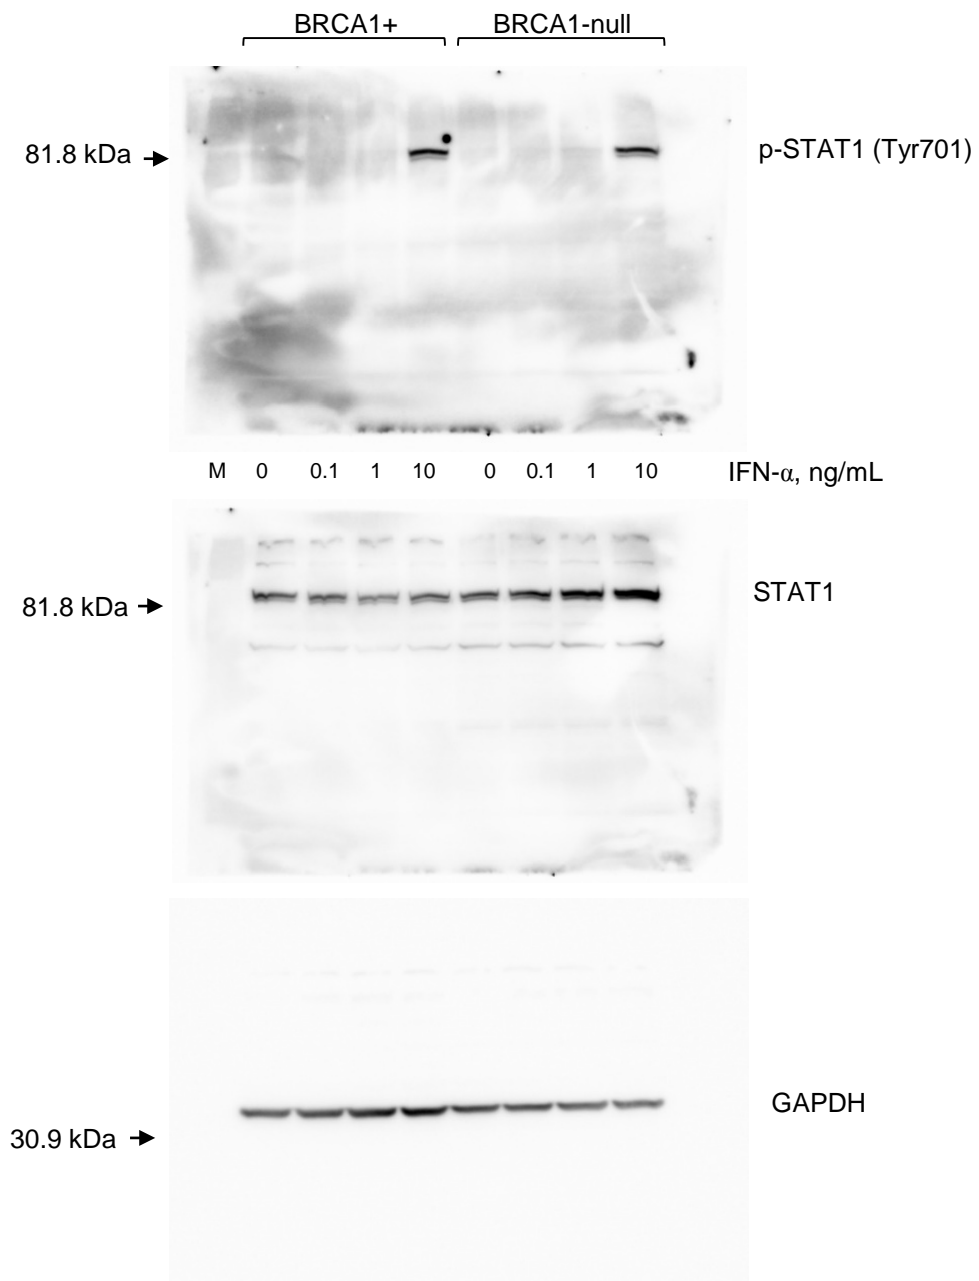

**Supplementary Figure 13.** Images of the whole blots from which the cropped images presented in Figure 3E were obtained. M, protein markers.

Supplementary Table 1. Sequences of the primers used for qRT-PCR and ChIP.

| Gene                              | Forward (5' to 3')      | Reverse (5' to 3')             |
|-----------------------------------|-------------------------|--------------------------------|
| <i>CXCL10</i>                     | AAAGCAGTTAGCAAGGAAAG    | TCAFFGGTCACCTTTTAGTG           |
| <i>CXCL11</i>                     | CTACAGTTGTTCAAGGCTTC    | CACTTTCACTGCTTTTACCC           |
| <i>IFI16</i>                      | TTAACCACGTTGAAACCAAG    | TCGGAAGACTTCATTCTCAG           |
| <i>IFITM1</i>                     | CTACTCCGTGAAGTCTAGG     | ATGAGGATGCCAGAATC              |
| <i>MX1</i>                        | CTGACTCTAATAGACCTTCCTG  | GATCTTATACCCAATGTCAGC          |
| <i>GAPDH</i>                      | AGCCACATCGCTCAGACAC     | GCCAATACGACCAAATCC             |
| <i>STAT1</i>                      | ACCCAATCCAGATGTCTATG    | GAGCCTGATTAAATCTCTGG           |
| <i>BRCA1</i>                      | GACTGTTTATAGCTGTTGGAAG  | TTTTGGAAGTGTGCTACC             |
| <i>BRCA1</i> (2594delC)           | TCCAAAGATAATAGAAATGAC   | AAACCTTGAATGTATTCTGC (Rev. 1)  |
| <i>BRCA1</i> (2594delC)           | TCCAAAGATAATAGAAATGAC   | ATTCAAAAGTGACTTTTGGAC (Rev. 2) |
| <i>CXCL10</i> (ChIP<br>STAT1)     | CCCAAATGAGCAATGTTTTCCCT | GGTCAAAGATCTGGAAGTGGC          |
| <i>CXCL11</i> (ChIP<br>STAT1)     | ATCAGAATCCGCTGCCCAA     | GTGAAAGCACTGTGAAAACCCA         |
| <i>IFI16</i> (ChIP STAT1<br>GAS1) | TACAACATCCTGCGGTTCCG    | GGAACAGTACTCACCTCACTGG         |
| <i>IFI16</i> (ChIP STAT1<br>GAS2) | CCAAGATCTCCTCCTGCCAC    | ACCCAGCAGACTTACATGTGA          |
| <i>CXCL10</i> (ChIP<br>H3K9ac)    | GGCACAACTTGCTGTTACCAA   | GGGAAGTCCCATGTTGCAGA           |
| <i>CXCL11</i> (ChIP<br>H3K9ac)    | GGACTGAAAAGCAAAAGTGAGAT | TCCCTCTTTGAGTCATGCACC          |
| <i>IFI16</i> (ChIP H3K9ac)        | GAGGGGAGAAGAAGCCATGTTG  | GAGACTCCTCCCACCAGTGTT          |

Supplementary Table 2. Checklist containing information pertinent to Reporting Recommendations for Tumor Marker Prognostic Studies (REMARK).

|                                 |                                                                                                                                                                                                                                                                                                                                                                                                                                                                                                                                                                                                                                                                                                                                                                                                                                                                                                                                                                                                                                                                                                                                    |
|---------------------------------|------------------------------------------------------------------------------------------------------------------------------------------------------------------------------------------------------------------------------------------------------------------------------------------------------------------------------------------------------------------------------------------------------------------------------------------------------------------------------------------------------------------------------------------------------------------------------------------------------------------------------------------------------------------------------------------------------------------------------------------------------------------------------------------------------------------------------------------------------------------------------------------------------------------------------------------------------------------------------------------------------------------------------------------------------------------------------------------------------------------------------------|
| <b>Introduction</b>             |                                                                                                                                                                                                                                                                                                                                                                                                                                                                                                                                                                                                                                                                                                                                                                                                                                                                                                                                                                                                                                                                                                                                    |
| 1                               | We investigated the relationship between an IFN- $\gamma$ signature and clinical outcomes of high grade serous ovarian cancer patients from the TCGA database. The specific objective was to determine whether mRNA expression levels of the IFN- $\gamma$ -regulated genes <i>CXCL10</i> , <i>CXCL11</i> , and <i>IFI16</i> in patient tumors was associated with patient survival.                                                                                                                                                                                                                                                                                                                                                                                                                                                                                                                                                                                                                                                                                                                                               |
| <b>Materials and Methods</b>    |                                                                                                                                                                                                                                                                                                                                                                                                                                                                                                                                                                                                                                                                                                                                                                                                                                                                                                                                                                                                                                                                                                                                    |
| Patients                        |                                                                                                                                                                                                                                                                                                                                                                                                                                                                                                                                                                                                                                                                                                                                                                                                                                                                                                                                                                                                                                                                                                                                    |
| 2                               | We studied high grades serous ovarian cancer tumors from patients included in the TCGA database (version 02/11/2016). Four exome sequence datasets (BCM SOLiD; BI IlluminaGA; WUSM IlluminaGA; WUSM IlluminaHiSeq) corresponding to 589 samples (patients), mutation and clinical data were downloaded from the TCGA portal.                                                                                                                                                                                                                                                                                                                                                                                                                                                                                                                                                                                                                                                                                                                                                                                                       |
| 3                               | Data used for analysis were obtained before patients received chemotherapy.                                                                                                                                                                                                                                                                                                                                                                                                                                                                                                                                                                                                                                                                                                                                                                                                                                                                                                                                                                                                                                                        |
| <b>Specimen characteristics</b> |                                                                                                                                                                                                                                                                                                                                                                                                                                                                                                                                                                                                                                                                                                                                                                                                                                                                                                                                                                                                                                                                                                                                    |
| 4                               | Tumor samples were obtained at the time of surgery and processed for RNA extraction and analysis of gene expression using RNA microarrays.                                                                                                                                                                                                                                                                                                                                                                                                                                                                                                                                                                                                                                                                                                                                                                                                                                                                                                                                                                                         |
| <b>Assay Methods</b>            |                                                                                                                                                                                                                                                                                                                                                                                                                                                                                                                                                                                                                                                                                                                                                                                                                                                                                                                                                                                                                                                                                                                                    |
| 5                               | Transcript levels were determined using the Agilent G4502A microarray.                                                                                                                                                                                                                                                                                                                                                                                                                                                                                                                                                                                                                                                                                                                                                                                                                                                                                                                                                                                                                                                             |
| Study Design                    |                                                                                                                                                                                                                                                                                                                                                                                                                                                                                                                                                                                                                                                                                                                                                                                                                                                                                                                                                                                                                                                                                                                                    |
| 6                               | Samples were classified as BRCA1-deficient or BRCA1-normal based on gene expression levels of BRCA1 and BRCA1 mutation profiles in the exome regions. 75 samples were considered BRCA deficient (56 with BRCA1 mRNA lower than the 10% quantile and 19 containing BRCA1 somatic mutations). 331 specimens were considered BRCA1-normal as BRCA1 mRNA levels were within the 25% quartile and no somatic mutations were observed in the exomic regions of BRCA1 or BRCA2 genes. Samples not included within one of these two groups were excluded. To determine whether the IFN- $\gamma$ signature carried prognostic value, OC samples were classified as “high expressing” subgroup, if the expression of the IFN- $\gamma$ -regulated genes <i>CXCL10</i> , <i>CXCL11</i> , and <i>IFI16</i> was higher than their corresponding median values or as “low expressing” subgroup, if the expression level for the 3 genes was lower than the median value. Seventy three and 84 ovarian tumors were thus classified as “high” and “low” subgroups respectively, and survival differences between these subgroups were determined. |
| 7                               | Clinical endpoints: Progression-free survival and overall patient survival.                                                                                                                                                                                                                                                                                                                                                                                                                                                                                                                                                                                                                                                                                                                                                                                                                                                                                                                                                                                                                                                        |
| 8                               | Candidate variables: mRNA expression levels of the IFN- $\gamma$ -regulated genes <i>CXCL10</i> , <i>CXCL11</i> , and <i>IFI16</i> , alone or in combination.                                                                                                                                                                                                                                                                                                                                                                                                                                                                                                                                                                                                                                                                                                                                                                                                                                                                                                                                                                      |
| 9                               | Sample size: The study was not designed to detect a specific effect size. We used all samples available in the TCGA database that met the criteria specified in Section 6.                                                                                                                                                                                                                                                                                                                                                                                                                                                                                                                                                                                                                                                                                                                                                                                                                                                                                                                                                         |
| Statistical                     |                                                                                                                                                                                                                                                                                                                                                                                                                                                                                                                                                                                                                                                                                                                                                                                                                                                                                                                                                                                                                                                                                                                                    |

|                                  |                                                                                                                                                                                                                                                                                                                                       |
|----------------------------------|---------------------------------------------------------------------------------------------------------------------------------------------------------------------------------------------------------------------------------------------------------------------------------------------------------------------------------------|
| <b>Analyses</b>                  |                                                                                                                                                                                                                                                                                                                                       |
| 10                               | The Kaplan-Meier method and the univariate Cox proportional hazard regression model were used to estimate differences in overall survival (OS) and disease-free survival (DFS) between groups.                                                                                                                                        |
| 11                               | Marker: An IFN- $\gamma$ signature was detected in BRCA1-deficient samples based on gene expression analysis of IFN- $\gamma$ -regulated genes <i>CXCL10</i> , <i>CXCL11</i> , and <i>IFI16</i> . Subgroups having high or low relative expression of these genes were formed and associations with patient survival were determined. |
| <b>Results</b>                   |                                                                                                                                                                                                                                                                                                                                       |
| <b>Data</b>                      |                                                                                                                                                                                                                                                                                                                                       |
| 12                               | Flow of patients through the study: Patients were those included in the TCGA portal.                                                                                                                                                                                                                                                  |
| 13                               | Patient demographics: No patient demographics were collected for the present study.                                                                                                                                                                                                                                                   |
| <b>Analysis and Presentation</b> |                                                                                                                                                                                                                                                                                                                                       |
| 14                               | Patients having high expression levels of IFN- $\gamma$ regulated genes <i>CXCL10</i> , <i>CXCL11</i> , and <i>IFI16</i> (elevated IFN- $\gamma$ signature) had longer overall survival ( $P=0.05$ , Cox proportional hazard regression) than patients with low expression levels.                                                    |
| 15, 16,17,18                     | A Kaplan-Meier plot and distribution of number of patients at risk (Fig. 6D) shows the relationship of IFN- $\gamma$ signature levels with overall survival.                                                                                                                                                                          |
| <b>Discussion</b>                |                                                                                                                                                                                                                                                                                                                                       |
| 19, 20                           | Included in the Discussion section of the manuscript.                                                                                                                                                                                                                                                                                 |



Supplementary Table 3. Unique genes (total of 1738) induced by entinostat in BRCA1+ compared with BRCA1-null OC cells ( $P < 0.01$ , t-test, FDR < 0.05). Gene expression was measured by RNAseq.

|          |              |              |             |            |
|----------|--------------|--------------|-------------|------------|
| PDGFRA   | WDR17        | NOTCH2NL     | KDM3B       | ZNF532     |
| SYT5     | MMP19        | APAF1        | CNDP2       | RBM19      |
| PRSS35   | RND2         | ATXN1        | SLC25A13    | MCM5       |
| CLCNKA   | RHOV         | MANBA        | HSPE1       | ELK4       |
| BAI3     | CD83         | LOC100506990 | DEPDC1      | NOL6       |
| PURG     | RARRES2      | ACBD4        | QRICH1      | SARS2      |
| GLI1     | IFIT5        | C20orf96     | NF2         | MID1IP1    |
| S1PR5    | LOC102724508 | IL27RA       | TFDP1       | SF1        |
| TMEM151A | NOV          | CACHD1       | YAP1        | ECE2       |
| RASD2    | AKAP6        | SCD5         | PITRM1      | MAP3K6     |
| MIR6795  | SPATA6       | B4GALNT4     | ENOSF1      | QSOX2      |
| PRSS3    | TCEAL3       | CTSB         | GLE1        | MAF1       |
| SNCG     | KDELC1       | NCEH1        | SEN3-EIF4A1 | NFXL1      |
| GGT1     | ELAVL2       | EHHADH       | NELFB       | ZNF326     |
| SPSB4    | SNAP25       | LPPR2        | PPP1CA      | XRCC3      |
| CHST9    | BIRC3        | FLNC         | SF3A1       | HUS1       |
| NDNF     | GPRC5B       | SLC6A15      | PSMD7       | MRPL36     |
| DLX4     | CCDC69       | RPL32P3      | POLDIP2     | VWA9       |
| SPATA18  | SYT12        | RAPH1        | BOD1L1      | TCERG1     |
| ENPP3    | STEAP4       | NTAN1        | CDK2AP1     | SURF6      |
| DACH1    | JAM2         | EPB4IL5      | NSD1        | DPH2       |
| KPNA7    | KHK          | PLAU         | MCUR1       | MLST8      |
| C1QL4    | ENTPD2       | CLDN6        | SRP68       | SMAD1      |
| AQP3     | FUT2         | SCARB2       | TYMS        | ZNF202     |
| GPR17    | SBK1         | CCND3        | PSMD6       | GEMIN4     |
| TMEM59L  | CSPG5        | ARL3         | B4GALT3     | PAGR1      |
| C1orf95  | LINC00501    | HMGN3        | DYNC1LI1    | ST20-MTHFS |
| GALNT16  | S1PR2        | RASA4        | BMS1        | NOL8       |
| TEPP     | C4orf19      | PLD1         | PKP2        | KDM2B      |
| SCN4B    | PTGES        | TANGO6       | EIF1AX      | HIGD2A     |
| SLC44A5  | SEC16B       | PRKAB2       | LIG1        | HIVEP1     |
| CNN1     | LOC100128885 | ZC4H2        | SLC3A2      | TRAPPC2L   |
| PHOSPHO1 | CHST11       | GNAL         | RNF187      | NOP2       |
| UPB1     | CPE          | IGFBP7-AS1   | IRAK1       | WWP2       |
| PPM1E    | LRRC75B      | GPRC5A       | RPF1        | VPS9D1-AS1 |
| CYP4X1   | FAM49A       | MITF         | AURKA       | YDJC       |
| TCEA3    | PGPEP1       | FGFBP1       | NUP88       | COBLL1     |
| TMEM204  | RHEBL1       | LIX1L        | NOP9        | AKAP8      |
| AK7      | VASH2        | SLC17A5      | PCNA        | TARBP2     |

|              |             |           |              |            |
|--------------|-------------|-----------|--------------|------------|
| TIMP4        | SLC25A27    | DNAH11    | TARS         | SREK1      |
| FEZF1        | TMEM108     | MALAT1    | TOMM6        | PUS7       |
| PPP1R36      | NEDD9       | VDR       | PITPNB       | ZADH2      |
| IL22RA1      | GKAP1       | N4BP3     | SIGMAR1      | METTL8     |
| RNF150       | IFITM2      | PORCN     | SEMA3A       | PSMG4      |
| FAM212A      | CSNK1G2-AS1 | MAP7D1    | TUBA1C       | CTBP1-AS2  |
| MFNG         | VWDE        | CHST7     | DDX56        | HMGB2      |
| SPTBN4       | DCAF12L2    | RHPN2     | ALG3         | GNAQ       |
| SRRM3        | MAP1B       | JRKL      | HERC2        | C1orf109   |
| CCDC160      | MCF2L2      | LEPRE1    | CDC20        | PMF1       |
| GABRA2       | PITX2       | SLC9A7    | SLC2A4RG     | SUV420H1   |
| CNIH2        | B4GALT1-AS1 | LPGAT1    | MORC2        | FAM86A     |
| CHD5         | C19orf80    | TSTD1     | UBE2C        | ZMYND11    |
| HECW1        | TMEM92      | TTC9      | DAZAP2       | AATF       |
| ERVV-2       | BOLA3-AS1   | THEM4     | ATP11C       | C9orf41    |
| RNASE4       | CRLF1       | TNFAIP8L1 | ERGIC2       | RPAP2      |
| SIX3         | LCN2        | LPCAT4    | RTCB         | ZIC1       |
| MB           | NEURL1B     | NT5DC3    | GPS1         | NUDT16L1   |
| LMOD1        | GPRASP2     | RAB3B     | PSMG1        | PUS1       |
| ANG          | MIR1262     | KLC3      | PRPF19       | CTPS1      |
| KCNH8        | VASN        | MARK4     | EIF4A1       | POLE4      |
| STX11        | PRAF2       | GPR56     | CLUH         | IGHMBP2    |
| SOBP         | ISL2        | CALCOCO2  | SSFA2        | MRPS26     |
| UCP1         | GSDMB       | ITGB6     | HNRNPA3      | JMJD4      |
| SLC38A4      | GALM        | DDIT4     | TIAL1        | TSSC4      |
| LINC00882    | UPK3B       | TMEM38A   | PPIP5K2      | PMF1-BGLAP |
| RGS17        | NAP1L2      | BRCA1     | SHMT1        | WASH5P     |
| MAPK8IP2     | NEFM        | PCDH1     | TNPO2        | E2F5       |
| CYP1B1       | SLC2A10     | CSRP2     | LSS          | BRMS1L     |
| PPP2R2C      | ANGPTL4     | C11orf49  | OSBPL2       | MTIF2      |
| TLE6         | CRAT        | GLTP      | PHB          | EXOSC4     |
| ARHGAP26-AS1 | TMPRSS13    | PRSS21    | PCNXL3       | GPATCH3    |
| TMEM221      | METTL7A     | FLJ22184  | DDX41        | SLC6A6     |
| PDGFRL       | CASC10      | PPM1H     | UBR3         | DPH1       |
| FIBCD1       | PTGS1       | TP53BP1   | ABCE1        | DHCR7      |
| LOC100128164 | DEF6        | CDKN2B    | NOP56        | PTPN18     |
| KRT5         | LINC00883   | NUCB2     | PSMB5        | FAM35A     |
| RAB39A       | SRSF12      | FAM129A   | TAF1D        | TFAP4      |
| CRABP1       | PDGFB       | BMP1      | RNF103-CHMP3 | MARVELD2   |
| CLIC6        | NT5M        | FAM8A1    | GNL2         | SFXN5      |
| LRRC63       | FCGRT       | ITGA2     | LRCH4        | RABL3      |
| LINC00673    | PLCD3       | PADI2     | PIGG         | MTHFS      |

|              |              |          |            |              |
|--------------|--------------|----------|------------|--------------|
| APLP1        | RAPGEF5      | CALCOCO1 | ASUN       | BAG2         |
| SOGA3        | EMID1        | PRCP     | KIF23      | ATF1         |
| NRG3         | SNX32        | GDPD5    | PRPF8      | GTF2I        |
| DLX3         | H1FO         | MBOAT2   | FKBP4      | PATZ1        |
| HERC2P10     | SPRED3       | SLC12A6  | PRNP       | PARVA        |
| ASTN1        | CTSH         | RGL3     | PNKD       | BMI1         |
| SELENBP1     | LRG1         | INPP5K   | SNRPF      | ZFAND2B      |
| OASL         | KLF8         | EMP2     | EIF1       | CCDC183-AS1  |
| XKR7         | TMEM51-AS1   | RTN4     | DDX10      | DNAJC2       |
| FAM47E       | TMEM198B     | COBL     | ARHGAP11A  | CHST14       |
| TNFSF12      | SESN3        | F2RL1    | FABP5      | TRMT61A      |
| APOBR        | NPTXR        | CDS2     | RIF1       | C7orf26      |
| ST8SIA5      | NBEA         | FBLIM1   | MDN1       | PSMB10       |
| GJA3         | RGS9BP       | PALD1    | DDX23      | SYDE2        |
| GAL3ST4      | SMARCA1      | GIPC1    | UBA2       | COL12A1      |
| LINC01132    | MT1M         | TBL1XR1  | SEC14L1    | PBRM1        |
| DDX25        | DDN          | ITPR3    | TOP1       | NEXN         |
| WDR66        | CXorf49      | MVB12A   | SENP6      | ICAM3        |
| HCK          | CXorf49B     | IGFBP7   | GJA9-MYCBP | CTHRC1       |
| BVES-AS1     | CXCR3        | SH3GLB2  | GTF3C2     | BAZ1A        |
| TRPM8        | GDPD1        | PIIP5K1  | TCEB3      | RNPEPL1      |
| MYZAP        | CAMK2B       | MANSC1   | DHX33      | ENOX2        |
| AP3B2        | DLX2         | ZNFX1    | FIGN       | IL1R2        |
| ABCB4        | DPYSL2       | PADI1    | PUF60      | DKK1         |
| MMP16        | TIAF1        | JUNB     | MKX        | HYPK         |
| TUBBP5       | NEAT1        | FAM168A  | DDX21      | SNORD20      |
| KIAA0408     | MT1F         | STARD10  | PES1       | SNORA75      |
| CPEB1        | TGFB1        | TRIM38   | BCAS2      | FNTB         |
| C1R          | SLC2A12      | STK10    | HJURP      | CLPX         |
| LINC01271    | LINC00891    | NFIC     | WDR36      | MZF1         |
| LOC101927934 | LOC100132741 | PIK3R3   | CAMSAP1    | THNSL1       |
| SMARCD3      | TBKBP1       | SOCS2    | RNF214     | ERCC6-PGBD3  |
| ZDHHC19      | SOWAHA       | NFE2L3   | EVA1A      | HNRNPAB      |
| LOC100128505 | DEPTOR       | GRHL1    | TPD52L2    | LOC101926943 |
| SCNN1D       | SEZ6L2       | KANK2    | NOL11      | SPRYD3       |
| DYRK3        | FOLR1        | CHKA     | FOXM1      | C14orf169    |
| GPR114       | PNMAL1       | SPEG     | ACAT2      | OPN3         |
| PLIN5        | SHISA2       | CORO2A   | SMARCD1    | TOR3A        |
| SLC8A1       | FBXO10       | CADM1    | MYCBP      | ANKRD39      |
| SPOCD1       | CFD          | MTUS1    | CKS1B      | LYAR         |
| TP63         | PLEKHO1      | ITGA3    | PA2G4      | SFRP1        |
| TLR9         | ZFP90        | FBXL18   | POLR1B     | RPL23AP7     |
| CCM2L        | HSH2D        | TSPYL4   | CDC45      | TEN1         |

|              |           |          |                |              |
|--------------|-----------|----------|----------------|--------------|
| GNA15        | ADORA2A   | ZBTB4    | MLX            | MMAB         |
| S1PR1        | TNFSF9    | TNFRSF21 | AKT1           | NCL          |
| ESRRG        | NLGN2     | GINM1    | BCL7B          | RNMTL1       |
| STK32A       | LINC01137 | SH3BGRL2 | SRSF4          | MESDC1       |
| PLA2G10      | C17orf103 | RPS6KA1  | ZNF721         | L3MBTL2      |
| PDLIM4       | PLCH1     | SERPINB5 | DCUN1D5        | BEND3        |
| CSPG4        | RBPMS2    | CTIF     | AHSA1          | CCNE1        |
| UNC13A       | IL10RB    | ATP13A2  | RTEL1-TNFRSF6B | ZNF41        |
| BMF          | MARCH2    | CD109    | RNF6           | ZFX          |
| PRRT3        | MYL9      | FHL2     | SMEK1          | ABCA11P      |
| PIK3C2B      | FGF13     | TRAK1    | ZC3H14         | C1orf186     |
| FEZF1-AS1    | FAM43A    | PLCB3    | TRMT1          | MOCOS        |
| ZNF521       | CCDC113   | PTRF     | ESRRA          | CCDC97       |
| TMEM211      | ANGPTL3   | ALDH2    | DIMT1          | PPAP2B       |
| MIR3189      | STXBP6    | IL18     | MTPAP          | FAM216A      |
| IDH1-AS1     | FGFR1     | HIBADH   | KIAA0368       | RPARP-AS1    |
| FAM212B-AS1  | NICN1     | STIM1    | AP1G2          | PRMT3        |
| LRRC38       | LEMD1     | TACC1    | DNAJC11        | TCHP         |
| C3           | KREMEN2   | PABPC1L  | ATP6V1D        | MSTO2P       |
| NCAM1        | STYK1     | SORT1    | DKC1           | LTBP2        |
| B4GALNT1     | DNAJC18   | WWC1     | C17orf85       | NRDE2        |
| FAM107A      | FBLN2     | RHBDF2   | SMC1A          | LINC01127    |
| ZEB1         | FMN1      | TMEM9    | ARID1B         | IGFBP5       |
| ZBTB8B       | GSN-AS1   | FAM102A  | MTHFD1L        | LOC101927884 |
| MRAP2        | SGTB      | GLCE     | KIAA0020       | MBNL1-AS1    |
| FBLL1        | TMEM8B    | IGFBP2   | PREB           | NETO2        |
| WDR31        | SERPINF2  | MOB3A    | UBXN4          | NFYC         |
| FLJ42351     | LYPD6     | FADS2    | CHMP3          | ZNF678       |
| FAM166B      | GPSM1     | PAM      | FNTA           | ERCC6        |
| LOC100130452 | JAK3      | IFNGR2   | LSM14A         | LOC101927746 |
| PDK4         | NEBL      | KIAA1522 | MAML1          | METTL1       |
| RLTPR        | ACRC      | CHEK2    | RPL26L1        | HOXA9        |
| MIR6784      | ERC2      | BCL9     | KIAA0754       | WBSCR16      |
| SNAI3        | MYH14     | SDC3     | DDX18          | NMI          |
| IL1B         | USP2      | CD24     | ZNF740         | HMMR         |
| REN          | NAT14     | RAB25    | MPHOSPH10      | SH2D4A       |
| LOXL2        | UBTD1     | TRAFD1   | DBF4           | RRP1         |
| MEF2C        | SLC4A3    | TOR1AIP2 | FCHO2          | HOXA10-HOXA9 |
| SORBS1       | GATS      | AFF1     | TMEM87A        | KIAA1875     |
| LOC440461    | ORAI2     | PBXIP1   | TNRC18         | SERPINB8     |
| ASPHD1       | CACNB3    | B2M      | BRIX1          | LY6K         |
| SAMD9L       | PLIN3     | CARHSP1  | QKI            | FAM174B      |
| GXYLT2       | CYP2J2    | LGMN     | PABPC4         | ARMC5        |

|           |              |          |                            |              |
|-----------|--------------|----------|----------------------------|--------------|
| RAB42     | RIPK3        | DBNDD1   | FAM3A                      | RRS1         |
| EEF1DP3   | ADAM22       | FSCN1    | SIPA1L1                    | POLR3D       |
| APBB1IP   | SNTA1        | CEP164   | HMGB1                      | PCBD2        |
| ACPP      | CACNG4       | SERTAD2  | HDGF                       | COA6         |
| NIPSNAP3B | RNF157       | IDS      | CHTOP                      | KCNIP3       |
| KLHL30    | BCAM         | CTDSP2   | TRIP13                     | DSCAML1      |
| CGNL1     | PEX11A       | RABAC1   | USP24                      | FAM181B      |
| NLGN1     | RELL2        | PRSS8    | PLK1                       | NSMAF        |
| SEMA6C    | CRYL1        | ZNF358   | PRKCZ                      | C1orf123     |
| GRID2IP   | DMGDH        | PRAME    | ALMS1                      | HMMR-AS1     |
| GPR153    | ZNF382       | TRIB3    | GTF3C5                     | FAM217B      |
| NEFL      | TTC39B       | MYO1C    | PMPCA                      | ODC1         |
| PIK3R5    | SELM         | LAMP2    | GNG5                       | TMTC4        |
| CYP2S1    | CDRT4        | ANO6     | NOP14                      | DUSP4        |
| F2R       | FAM47E-STBD1 | CLDN3    | RTEL1                      | CEBPD        |
| ACAP1     | FREM2        | MAGED1   | NUCKS1                     | LRRC56       |
| ELMOD1    | AAMDC        | SORL1    | STAG3L5P-<br>PVRIG2P-PILRB | JAG1         |
| PVRL4     | LCP1         | ACSL3    | CCNB1                      | ZNF407       |
| AS3MT     | PHLDB1       | AKAP13   | WDR74                      | FAM86DP      |
| IRAK3     | TBC1D10A     | XPR1     | CDC16                      | LOC100129518 |
| FLT4      | PRSS53       | NUSAP1   | WIZ                        | WASH1        |
| BIK       | BBS9         | RIOK3    | TXNDC5                     | CCNO         |
| SLC16A12  | TMEM180      | UBE2H    | RBM22                      | CECR5        |
| ADAMTS7   | FRMD6        | VASP     | THEM6                      | C1orf131     |
| SALL4     | C1orf210     | CACUL1   | SLC29A2                    | MSTO1        |
| WFDC3     | DTX1         | POR      | PAN3                       | NIPSNAP3A    |
| KITLG     | SMIM8        | CDCA7L   | PPAN                       | PDIK1L       |
| FAM13C    | STARD9       | ETS1     | STRIP1                     | PMS2P9       |
| SGPP2     | PAPLN        | UGCG     | GSK3A                      | FOXG1        |
| CKMT1A    | FGF5         | CGN      | GPATCH4                    | HOXA10-AS    |
| GRIN1     | KIAA0513     | ECE1     | TSR1                       | SIM2         |
| IFIT1     | PECR         | CASC4    | BRCA2                      | PTGER3       |
| MAF       | PAPSS2       | CLSTN1   | BCLAF1                     | STS          |
| MLLT4-AS1 | MYBPC2       | SGMS1    | ITPK1                      | CHCHD4       |
| RTCA-AS1  | CAMK1D       | KIAA0195 | MRPL15                     | ZIC4         |
| RHBDL1    | ATP7B        | KRT7     | SSH1                       | SNORD97      |
| HTR1D     | LOC284454    | MYH9     | MRPS30                     | SNORD82      |
| GFI1      | FAM161A      | SREBF1   | EIF5                       | LOC100289580 |
| DNAJC22   | KIF7         | MRI1     | EXOSC8                     | RAB40C       |
| PGAM2     | HS1BP3       | ANKRD1   | MAML2                      | EDNRA        |
| RASSF2    | CCDC80       | PVRL2    | NUP50                      | THAP7        |
| RRAD      | PCSK5        | TNIK     | NCLN                       | PCDH7        |

|              |              |          |          |              |
|--------------|--------------|----------|----------|--------------|
| INPP5J       | AMT          | GCA      | RINT1    | TLX3         |
| TMEM71       | ATF3         | ACSL1    | QTRTD1   | HOXA10       |
| LOC100132891 | TYRO3        | TSC22D4  | NXF1     | MYL5         |
| LOC101927043 | PPARG        | SPATS2   | RNF44    | SOX2         |
| PLCL1        | SLC41A2      | GNAI2    | FUS      | RPE65        |
| TMC7         | CSF1         | SPNS2    | TMBIM4   | CBX8         |
| AMPH         | LOC101926996 | SNX2     | CASC3    | PSEN2        |
| ZNF821       | TGM2         | PTK7     | JADE2    | ADAMTS18     |
| C1QTNF2      | SYTL4        | VHL      | FH       | DOK7         |
| PELI2        | TMEM241      | EID1     | UFC1     | ID4          |
| SEMA4G       | FAM229B      | PITPNM1  | DGKH     | TBX18        |
| IL7          | FBXL2        | MAPK8IP3 | YARS2    | TLL12        |
| WNT6         | DAB2         | ARNTL2   | GTF3C6   | VPS37C       |
| MORN3        | DNAH17       | MAP1S    | CEBPG    | L3HYPDH      |
| TRIM34       | LOC730101    | MICU1    | MFN2     | FAM178A      |
| SHF          | BAIAP2-AS1   | NOTCH2   | SEMA3C   | SIM1         |
| CCDC148      | OGDHL        | KIFC2    | PSPH     | METAP1D      |
| OTUB2        | GSTM4        | F11R     | CALB1    | SNORA8       |
| KCNK15       | TNFRSF11B    | SDCBP    | CUL4A    | ROR1-AS1     |
| GSTM3        | GRB7         | UBAP1    | SOS1     | MLYCD        |
| C12orf80     | CHRNB1       | CD59     | DHX34    | ATXN7L2      |
| DMBX1        | CMBL         | ABCC1    | TUBGCP2  | SERPINE2     |
| MAPK11       | BTN3A1       | DCTPP1   | FAM98A   | GBE1         |
| ZNF221       | DUSP10       | LRBA     | C17orf49 | NETO1        |
| GAD1         | GNG12-AS1    | VCL      | POLG     | SAYS1D       |
| COL25A1      | CD97         | LAPTM4B  | TCOF1    | ABHD16B      |
| ZNF774       | GAS6-AS2     | ATP8B1   | HSPD1    | ZNF469       |
| NPBWR1       | FHAD1        | PHACTR4  | LNPEP    | WNT3         |
| RNF122       | IQCE         | PLXND1   | CLASRP   | RABGGTA      |
| SOX3         | SEC14L2      | PPP1CB   | EMG1     | HIST2H2BC    |
| ILDR2        | HDAC5        | KRT8     | RBM39    | TUSC1        |
| TSPAN2       | MFAP3L       | FKBP8    | TRMT2A   | PLD6         |
| C8orf4       | GATSL2       | AMFR     | ALYREF   | FAM53A       |
| HIF3A        | SIDT2        | BST2     | IFT172   | EPHX4        |
| RHBDL2       | CRIP2        | MYO10    | SMEK2    | DOCK8        |
| SEC31B       | HTR7P1       | PPFIBP1  | VAC14    | MFAP5        |
| ATRNL1       | LY75         | MAGT1    | TRPM2    | PDE9A        |
| LRRC6        | IPO5P1       | TIPARP   | EXOSC3   | PCSK6        |
| TCTN2        | IGFN1        | FAM129B  | SUMO3    | LOC101926987 |
| TRANK1       | FBXO17       | PPP3CA   | DDX19A   | AVEN         |
| DFNB31       | AOX1         | BMPR2    | SAFB     | CHDH         |
| RUNDC3A      | TFEB         | DFFA     | CCDC43   | CCDC146      |
| BCL3         | FRY          | OSBPL9   | METT13   | SLC2A9       |

|           |                    |          |            |           |
|-----------|--------------------|----------|------------|-----------|
| PLSCR4    | TCF7               | UBB      | TET3       | NCOA5     |
| PNMA2     | MME                | PTK2     | DPH7       | WNT5B     |
| FOXD3     | SPAG4              | LASP1    | TTC27      | AFG3L1P   |
| LIFR      | ANK2               | KRT18    | LYRM4      | CCNA1     |
| PON3      | PXK                | HDAC3    | GPR125     | ADPRH     |
| CHST6     | MFI2-AS1           | MKNK2    | LDHA       | LENG1     |
| SERPINE1  | PARP14             | MFN1     | NCOA6      | KPTN      |
| CPNE8     | PRX                | KIF1B    | CDC25A     | EPC1      |
| PIK3IP1   | PIK3CD             | MAST2    | CCNA2      | SLC26A1   |
| PROM2     | CKB                | HK1      | POP4       | RGS7      |
| PRSS22    | ABCB9              | ACTB     | GRPEL1     | ZBTB37    |
| PMP22     | ZNF514             | LAMC1    | LSM7       | PRDM5     |
| HEYL      | ACBD7              | PLD3     | PPP1R8     | FZD8      |
| FER1L4    | MAP3K12            | PCMT1    | DHX37      | DNLZ      |
| TLCD2     | LIMD2              | RFC1     | PHF14      | NTM       |
| HES2      | TCEA2              | FYTTD1   | ACTR1B     | CAP2      |
| LINC01270 | TSPAN5             | ASAP2    | PPIF       | PALMD     |
| TMEM74B   | FBLN1              | SND1     | DTYMK      | C8orf82   |
| GOLGA6L9  | SGK223             | SEC63    | HSPH1      | MCM9      |
| LRRIQ1    | REEP1              | MAL      | SEH1L      | MIR6775   |
| ADAMTS7P1 | NINJ1              | PXN      | CTU2       | ADAMTS14  |
| VCAN      | TNNC1              | CMTM6    | YRDC       | ELFN1-AS1 |
| UBE2Q2P2  | FBXO41             | CD47     | HYAL2      | AMPD3     |
| CILP      | FAM105A            | RHOC     | RAB21      | GNA14     |
| SPATA6L   | KIAA0930           | SRPR     | MBNL3      | FAM201A   |
| ANKRD22   | LIPA               | CCT2     | GEMIN5     | ANKMY1    |
| GABRP     | SNX29              | PSMB2    | HGSNAT     | NIPAL2    |
| TLR6      | XDH                | IPO5     | DVL1       | IRF7      |
| SLC43A1   | TMEM44             | G3BP1    | MYO19      | ID2       |
| PLCD1     | BTN2A2             | KHSRP    | SUPV3L1    | MRM1      |
| WSCD1     | NOL4L              | ILF3     | IMP4       | FAIM      |
| GBP2      | STBD1              | SLC25A5  | POLE3      | DUSP2     |
| ACSS3     | TMEM132A           | GNL3     | ARID1A     | IL20RA    |
| EYA2      | E2F2               | ARHGDI1A | SLC12A2    | PP14571   |
| ABCC6     | CEP70              | EIF3B    | SLC35C1    | C19orf71  |
| MLLT3     | ARHGAP44           | RALGPS2  | SPAG7      | EME2      |
| TRAM1L1   | TRIM14             | TRIM28   | MAGOHB     | FLRT2     |
| LINC01096 | AP4S1              | PAK2     | NCOA2      | SMPDL3A   |
| CDC42EP5  | LRRC1              | BOP1     | STK35      | MIR6847   |
| LGR6      | ARMCX5-<br>GPRASP2 | PSMF1    | PEX5       | MIR6763   |
| LOC727751 | MATN2              | FAM83H   | ZFP91-CNTF | NHEJ1     |
| WFDC2     | FAM214B            | PSMC1    | FAM208B    | MPL       |

|              |            |                |              |              |
|--------------|------------|----------------|--------------|--------------|
| DLX5         | ZBED8      | CYC1           | LSM14B       | LINC01111    |
| KLHDC8A      | CRIP1      | H2AFZ          | UTP15        | SNORA25      |
| CLIC3        | MALL       | ZNF207         | NRG1         | ZNF285       |
| SPTB         | GPX3       | SRSF1          | SPAG1        | LOC100499489 |
| LOC645638    | NOXA1      | AURKAIP1       | TOMM22       | ATP6V0D2     |
| MAP2         | CEP68      | POLR2H         | SLC25A22     | CRISPLD2     |
| TMEM159      | PTPRU      | WDR3           | PIGU         | MIR4800      |
| PDE4C        | L3MBTL1    | DDX27          | MBNL1        | C9orf172     |
| BARHL2       | SLC25A42   | SERBP1         | RBM8A        | ASB9         |
| LIMS2        | CMTM8      | NT5E           | ZFHX4        | TNRC6C       |
| LOC80154     | CPM        | SBF1           | ZGPAT        | CCDC74B      |
| RIPPLY3      | EFNA1      | PGM1           | ASXL2        | LIPT2        |
| NRIP3        | EPHX1      | TIMM50         | LOC100288181 | ACOT1        |
| HCAR1        | BCL6       | SRP72          | ABLIM1       | LIX1         |
| STAG3        | TSPAN9     | RAN            | CSRP2BP      | MIR133A1HG   |
| TMEM169      | SLC1A3     | DNAJC9         | CDH13        | CMPK2        |
| FGF2         | LRRC61     | USP5           | ASH2L        | SLC22A3      |
| C19orf83     | LMBR1L     | FUBP1          | USP36        | UNC5CL       |
| MIR4489      | FCHSD1     | SNX19          | NIN          | ADAM12       |
| SYT14        | CCDC24     | CCND2          | DUSP6        | THAP7-AS1    |
| ACTBL2       | TPST2      | CDT1           | ESF1         | KCNJ2        |
| ADAM8        | RRAS       | GTF3A          | POLR2F       | LOC101928417 |
| LUCAT1       | GCNT2      | PGD            | CCDC59       | KLF15        |
| GNAO1        | CDKN2AIPNL | C7orf55-LUC7L2 | TNPO1        | KDM8         |
| LOC100653515 | B4GALNT3   | SPIN1          | ANP32B       | MED15P9      |
| PRSS54       | PRKCG      | TMEM109        | CHRAC1       | EDN2         |
| GATSL3       | ETNK2      | TWF1           | SLC25A38     | S100G        |
| SFXN3        | EVI5L      | TIMELESS       | CPSF7        | MIR302D      |
| HCN3         | FMNL3      | TFAM           | MRT04        | MIR302C      |
| C2orf81      | CAMK2D     | PSMC4          | PAN2         | RYR3         |
| MIR6777      | SLC9A2     | SMPD4          | SBDSP1       | MIR302B      |
| NRTN         | C4orf33    | SPOCK2         | ARAF         | MIR302A      |
| EHD3         | EPHB2      | DAZAP1         | PAF1         | ZFHX4-AS1    |
| PLCB1        | RNF215     | AUP1           | ICT1         | HNRNPA1P33   |
| GOLGA6L10    | ARHGEF3    | SEC61A1        | NAT10        | MIR4706      |
| RPS6KA6      | MGAT4A     | UBE2Q1         | ZFP91        | CLYBL-AS1    |
| RPS17        | CCBL1      | DDX49          | SBDS         | LINC01125    |
| GALR2        | ZFYVE19    | PSME3          | UCKL1        | MIR140       |
| GAL3ST3      | SPIRE2     | PPP2R1B        | RPP40        | MKRN3        |
| ELF3         | ZSCAN26    | BAP1           | APRT         | KCNJ2-AS1    |
| HOMER2       | APBB3      | PFKL           | TOMM40       | CYP4F62P     |
| OOEP         | ZFYVE1     | PHIP           | DCPS         | TUBA3E       |
| ANGPTL6      | DFNA5      | THADA          | ELAC2        | POTEF        |



|          |              |          |             |
|----------|--------------|----------|-------------|
| SOD3     | GCHFR        | SLC39A10 | STRADA      |
| ADHFE1   | LOC100131564 | TBC1D14  | ADCK2       |
| GGT6     | BLVRB        | ERCC3    | SMYD5       |
| ACP5     | TGFB2        | TSC22D1  | BUD13       |
| FAM155B  | ARSK         | KIF20A   | RCN1        |
| MAPK8IP1 | C10orf55     | BIRC5    | GMEB2       |
| AGPAT4   | CLMN         | MRPS2    | POM121C     |
| ATP7A    | TRERF1       | MRPL3    | DDRKG1      |
| ACVR1C   | C3orf52      | USP1     | MED27       |
| BVES     | LBH          | SORD     | MARCH1      |
| CLDN9    | CREBL2       | WDR43    | COMMD3-BMI1 |
| RASSF4   | PFKFB4       | AFG3L2   | NOP16       |
| EMP3     | SRGAP2       | LPHN2    | ARRDC3      |

---

Supplementary Table 4. Unique genes (total of 638) induced by entinostat in BRCA1-null compared with BRCA1+ ovarian cancer cells ( $P < 0.01$ , t-test, FDR  $< 0.05$ ). Gene expression was measured by RNAseq.

|              |              |         |              |              |
|--------------|--------------|---------|--------------|--------------|
| NOVA2        | PRR5L        | WBP5    | ALDH6A1      | LINC00092    |
| CXXC4        | RAB3IL1      | ITGA6   | CYP20A1      | TUBA3FP      |
| RNY5         | TRIM6-TRIM34 | HMGN4   | GINS4        | GP2          |
| CACNA1G      | S100A5       | UBE2E2  | ZACN         | DPPA4        |
| ADAMTS10     | GRAMD1B      | ODF2L   | ZFYVE26      | LOC100996291 |
| COL2A1       | TRIM6        | STX10   | PDDC1        | MS4A7        |
| FAM57B       | ESYT3        | CDCP1   | PQLC2        | KANK4        |
| RASGRP2      | LURAPIL      | CALM2   | RIN1         | GPR12        |
| RGS11        | LOC283070    | LYN     | NMNAT1       | LINC00907    |
| GPM6A        | EVA1C        | SRC     | CAMK2N1      | ADRA1A       |
| MYPN         | TMEM156      | USP54   | PANK1        | CYP8B1       |
| LOC729966    | LPL          | BTG3    | SLCO2A1      | LINC00939    |
| ARHGEF25     | EPN3         | CLGN    | HSCB         | HAVCR2       |
| TOX3         | GIPC2        | CKAP4   | UPK3BL       | C1orf140     |
| TMC3         | FBXO16       | ARL6IP6 | PHF2         | LINC00330    |
| TMEM40       | S100A3       | DOCK4   | CACFD1       | SCN2B        |
| FLJ42969     | SYT1         | B3GNT5  | IRGQ         | CD82         |
| TDRD5        | ZDHC1        | FANCL   | ADAT1        | RHBG         |
| USHBP1       | HIC1         | SKAP2   | COX18        | CR1          |
| TCN1         | ZNF883       | UBE2W   | ZNF76        | CALN1        |
| KCNT2        | GPR124       | VEZT    | POLR2J2      | TLR10        |
| LINC00635    | CACNA1A      | MTMR6   | MED18        | FAM74A4      |
| SDS          | MUM1L1       | IGF2BP2 | RABL2B       | LOC101928104 |
| MAP6         | UST          | UBE2E1  | LOC100287098 | GDF6         |
| DMRT2        | NTF3         | SLC43A3 | BMS1P4       | NAP1L6       |
| OTOGL        | ARMCX2       | BRE     | TSC22D1-AS1  | OTX2-AS1     |
| OR1F1        | GRIN3B       | EFR3A   | MDM4         | C7           |
| KCND2        | TBX6         | TTL     | DFFB         | ITGAX        |
| TMEM63C      | SYTL3        | TNIP1   | WHAMM        | SIGLEC8      |
| VAX1         | MAMDC2       | HN1     | RNF125       | LOC101927796 |
| SIRPG        | PTPLAD2      | ELK3    | KIF26B       | LOC101928401 |
| SV2A         | CTB-113P19.1 | SRI     | SPHK1        | SULT2A1      |
| MIR4712      | KRTAP2-3     | ZNF706  | ZNF737       | LINC00696    |
| ABCB1        | SLC1A1       | ABCD3   | ILF3-AS1     | FENDRR       |
| LY96         | MIR1273H     | HM13    | MAN1B1-AS1   | SLC6A14      |
| CLIC2        | SULT4A1      | MPZL1   | PRKCDBP      | NDST3        |
| DEGS2        | PLVAP        | JUN     | NME6         | POM121LIP    |
| SLC2A14      | METTL7B      | AMOTL1  | UNKL         | C8orf31      |
| LOC100192426 | KCTD17       | AGPS    | DYRK1B       |              |

|              |              |          |              |
|--------------|--------------|----------|--------------|
| CD163L1      | NUDT17       | ZMYND8   | PPM1K        |
| LOC152225    | DEPDC7       | TP53BP2  | NLRP10       |
| EFHC2        | TTC33        | REEP3    | TRPV1        |
| CLCNKB       | FAR2         | PKP4     | NEXN-AS1     |
| NOTUM        | ZNF30        | HNRNPUL2 | ZNRF3-AS1    |
| FAM19A4      | ZNF365       | KIAA0100 | PERM1        |
| FAM196B      | BCHE         | NFATC2IP | IKZF3        |
| ADAM28       | C16orf98     | VAV2     | LOC100134868 |
| ETNPPL       | TRAF1        | KDM2A    | SMOC2        |
| GPR4         | FAM83A       | DCAF11   | HHIP         |
| LOC441461    | TSPAN33      | MROH1    | LOC284023    |
| CPNE5        | NPR3         | INCENP   | MIR4751      |
| CCDC173      | PARVG        | LRFN4    | FAM71F2      |
| NRG2         | AQP1         | CIAO1    | CDH4         |
| LDHD         | C2orf88      | CBX5     | LOC101928514 |
| CLEC2B       | STEAP1       | DGKZ     | KIAA1456     |
| LOC101928796 | CPLX1        | SLC12A7  | CCDC171      |
| GPR112       | EPB41L4B     | ICMT     | LINC01105    |
| MIR6794      | EFHD1        | GTPBP3   | CD84         |
| LOC100996385 | TMEM200B     | TPRG1L   | SLC24A4      |
| KRT77        | FAM169A      | PTPN23   | PPP1R26-AS1  |
| KRT1         | DENND2A      | TENM3    | HP09025      |
| AHSG         | TP53I11      | POM121   | RPL23AP64    |
| KRT76        | MAP9         | FANCA    | GPLD1        |
| CDIPT-AS1    | PRKAA2       | FOXN3    | NFAM1        |
| MIR1976      | SMIM10       | CNTROB   | DAND5        |
| SLC16A14     | DUSP5        | SNHG3    | BNIP1        |
| LOC102723641 | TMCC3        | XAB2     | LOC101927415 |
| IL1RN        | NPNT         | SGPL1    | BCL2L15      |
| ARHGGEF38    | SLC25A45     | MAVS     | CYP1A2       |
| NIPAL4       | PEAR1        | MFSD11   | C21orf62     |
| FAM133A      | FAM101B      | ABCD1    | LOC100996251 |
| SERP2        | TFAP2A       | SLC35F6  | ARGFX        |
| LOC100505795 | C19orf26     | LMNB1    | PRICKLE2-AS3 |
| BCO2         | ALPK3        | DHX38    | AIPL1        |
| PTGS2        | IL23A        | MED16    | IL12RB1      |
| EBF4         | TYMP         | TNS3     | EMX2OS       |
| CD8A         | GPR160       | HTT      | CCR6         |
| PTGIR        | LOX          | FURIN    | KCNJ11       |
| CD247        | LOC100126784 | PPP1R16A | SLC5A5       |
| CTTNBP2      | F8           | ZC3H3    | CCL5         |
| AVPR2        | KATNAL1      | CYHR1    | LINC00970    |
| CASP1        | NOVA1        | PCK2     | LINC00574    |

|              |                 |              |              |
|--------------|-----------------|--------------|--------------|
| SLC19A3      | DPF1            | INSIG1       | SIGLEC10     |
| MYO15A       | MAP3K7CL        | RAB11B       | LOC101928738 |
| COPZ2        | M1AP            | NCAPH2       | SPN          |
| TCEAL2       | LOC100507373    | SQSTM1       | FBXL13       |
| CASC15       | CYGB            | RCE1         | MIR4492      |
| FRZB         | SYBU            | RPS6KA4      | FGB          |
| ABCG2        | SCEL            | B4GALT7      | GBP6         |
| WNT10B       | SLC7A7          | GTSE1        | SLC36A2      |
| HNF4G        | MRC2            | ILVBL        | POM121L10P   |
| CSF2         | RAB8B           | CCNF         | C1orf229     |
| DZIP1L       | CXCL1           | HOOK3        | NLRP12       |
| LINGO3       | UNC13D          | DCXR         | LOC101929259 |
| FAM131B      | P2RX4           | OGFOD3       | ADAMTS4      |
| BARX1        | FAM131A         | NUP43        | LOC400644    |
| CXCL2        | ABLIM3          | LYPD1        | SEC14L4      |
| FAXDC2       | HOXA3           | TMEM192      | SGSM1        |
| PDX1         | LOC730102       | THBS1        | LOC284865    |
| ELN          | CROCC           | PHPT1        | FGD5P1       |
| RARRES1      | SLC16A7         | ZZEF1        | VSTM4        |
| ZNF385B      | GNG11           | CCDC88C      | LINC01134    |
| ELMO1        | RILPL2          | MIB2         | ATCAY        |
| ALOXE3       | SYS1-DBNDD2     | PTPN2        | SMIM17       |
| CNTN5        | LOC100506071    | CRTC1        | FLJ30403     |
| TBXAS1       | PAQR3           | ABCB8        | ADAMTSL2     |
| EPB41L3      | PRTFDC1         | LOC100190986 | SRRM2-AS1    |
| GJA4         | BCL10           | C9orf78      | LINC00327    |
| CNTD2        | SEMA4B          | FBXL6        | ABCB5        |
| PILRA        | FAM110A         | AIF1L        | KANTR        |
| PRDM7        | CCDC82          | ZNF185       | C14orf105    |
| ARHGAP24     | TNFSF12-TNFSF13 | IVD          | L1TD1        |
| CCL20        | WDR47           | C17orf62     | LOC101927666 |
| MAGI2        | PRSS16          | MRPL55       | BMS1P5       |
| LRRK2        | OSBPL6          | ZFYVE21      | LOC100506385 |
| CALCRL       | TBPL1           | SHPK         | LUZP2        |
| ST6GALNAC1   | ST6GALNAC4      | TRIM65       | VENTX        |
| RASIP1       | PLAGL1          | TMPO-AS1     | AKR1D1       |
| BATF2        | S100A2          | SLC1A5       | ATP11A-AS1   |
| ADCY4        | KLHL5           | ASPSCR1      | LOC101928580 |
| GCK          | BACH1           | CWF19L1      | LINC01247    |
| LOC100506985 | C17orf104       | INHBB        | TNFSF14      |
| ISM2         | ZNF277          | GATAD1       | PIWIL2       |
| GRIN2D       | PLOD2           | ORC6         | FCAR         |
| TMEM121      | HAGLR           | VPS53        | OR51E2       |

|            |          |            |              |
|------------|----------|------------|--------------|
| CEP112     | TMEM14A  | ZNF33A     | ITGAL        |
| VNN1       | CLDN11   | NADK2      | FLJ36777     |
| HAND2      | DNAH14   | NOM1       | LINC01212    |
| ARMC3      | TAOK3    | POLH       | NUTM2B       |
| C11orf70   | CLDN12   | WDR90      | BEND2        |
| DENND6B    | ALKBH2   | RPP14      | LARGE        |
| TLR5       | POLR3G   | GNL3L      | RASGRP4      |
| ESAM       | ACAA2    | TMEM104    | PBOV1        |
| LOC286367  | DHX57    | TRMT2B     | LOC101929224 |
| VAV3       | CREB3L2  | SLC25A15   | UTY          |
| CCDC110    | LANCL1   | TUBB3      | INMT         |
| DLGAP3     | IMPA1    | IER5L      | LOC101929680 |
| TCF24      | TMC6     | MSH3       | LOC101929372 |
| SLC9A5     | ZNF219   | MEF2BNB    | CXorf36      |
| FAM179A    | FAM189B  | C1orf174   | MTHFD2P1     |
| RNF157-AS1 | HDGFRP3  | TOP3B      | MIR1204      |
| ADAM23     | PFDN1    | PINK1-AS   | TAT          |
| NDRG2      | ARHGAP12 | FAM84B     | LOC101926897 |
| NAALAD2    | CFL2     | HEATR3     | DNAJC27-AS1  |
| SKAP1      | AIG1     | LINC01128  | LOC100144595 |
| HTR7       | FOSL1    | ARSD       | RFPL1S       |
| ANXA9      | PVT1     | EXPH5      | LOC283731    |
| TCF7L1     | TGFA     | PTRHD1     | WT1-AS       |
| IL18R1     | CEP55    | PTRG       | PABPC1P2     |
| TSHZ3      | RREB1    | FAM83H-AS1 | FRY-AS1      |

---

Supplementary Table 5. Common genes (total of 1274) induced by entinostat in both BRCA1-null and BRCA1+ ovarian cancer cells ( $P < 0.01$ , t-test, FDR  $< 0.05$ ). Gene expression was measured by RNAseq.

|             |          |              |             |           |
|-------------|----------|--------------|-------------|-----------|
| PRTN3       | WIPF3    | MLF1         | CD68        | TNFRSF12A |
| SLITRK3     | CDKN1A   | CHST2        | SLC44A3     | AKT1S1    |
| SEMA6B      | ARL10    | PPM1M        | SEC24D      | PI4K2B    |
| TESC        | NPW      | PKIA         | MCU         | SEMA4C    |
| LPPR3       | COL9A3   | RFX2         | ZHX1        | RRP9      |
| PPP2R2B     | CCDC88B  | HSD11B1L     | FAM114A1    | PCMTD2    |
| ITGA2B      | GDF15    | CEACAM19     | SPATA20     | RAVER1    |
| PALM3       | HSD17B6  | CCDC88A      | RNF212      | CDK12     |
| SLC45A1     | PPP1R14A | GPR63        | SLC39A14    | PRR12     |
| SRCIN1      | MSRB3    | LOC101927051 | CD9         | DSP       |
| SERPING1    | FLJ44313 | BLVRA        | EPB41L1     | ZNF512B   |
| TUBB4A      | LEPREL2  | PRSS23       | SLC25A12    | KDELC2    |
| PPARGC1A    | EBI3     | TP53INP2     | PALM2-AKAP2 | FGFRL1    |
| DACT3       | MAST1    | PTX3         | AKAP2       | CTBP1-AS  |
| KIF5C       | SLITRK4  | LRP1         | CPNE7       | FBRSL1    |
| GIPC3       | SCAMP5   | TLE2         | P4HA1       | C1orf122  |
| KCNJ8       | SNAI1    | ZNF215       | TENC1       | STC2      |
| CCDC151     | CYP27B1  | KIAA1211     | PDE4DIP     | RHOT2     |
| PIANP       | TRPV4    | LAMA1        | CERCAM      | SSNA1     |
| SOX18       | GAMT     | PAX9         | VPS37B      | IGFBP3    |
| NKX6-1      | FAM171B  | KCTD14       | CAPG        | IPO4      |
| HMGCLL1     | PCDHB17  | ZNF211       | NEK9        | STRA13    |
| SH2D3C      | CORO1A   | GYLTL1B      | TNFSF13     | CCND1     |
| HPCAL4      | CCDC114  | SLC46A3      | ARRB2       | KAT7      |
| FAM131C     | SALL2    | PTAFR        | FADS3       | TPRN      |
| SEPT5-GP1BB | COL1A1   | RAB3A        | ECI2        | DUS1L     |
| RORB        | PROCR    | DHRS7        | LDLRAD2     | EP300     |
| SLFN11      | LCK      | SERPINB7     | NIPSNAP1    | EIF4G2    |
| C1QL1       | TIE1     | RAC2         | MMP15       | DIS3L     |
| COL8A2      | NRK      | CGREF1       | ATP6V0A1    | MCRS1     |
| C8orf88     | SLC16A2  | SERPINB1     | TNC         | WDR4      |
| SPX         | MFAP2    | HID1         | TICAM1      | SIRT1     |
| EXOC3L4     | ANKRD29  | FAM92A1      | FUCA1       | HMGN2     |
| CRABP2      | LEF1     | TPST1        | LAYN        | SH3PXD2A  |
| GYG2        | GDPD3    | ST6GALNAC3   | MERTK       | CTCF      |
| ATP2A3      | NBPF14   | FGF11        | MEX3A       | TOP1MT    |
| PRRT4       | VWA5A    | MEIOB        | ECH1        | FASN      |
| IGSF10      | SYNE1    | SDC4         | RITA1       | SRM       |
| FXYD6-FXYD2 | GPRIN2   | STX2         | ZMYM1       | ACTR8     |

|           |          |           |           |          |
|-----------|----------|-----------|-----------|----------|
| TSLP      | FAM167B  | SUN3      | ARHGEF19  | CEP170B  |
| LINC01305 | IGFL1    | CCDC28B   | B3GNT3    | HAUS7    |
| SYT9      | ABHD6    | C3orf55   | MAPK3     | ALS2CL   |
| NKX2-1    | APOE     | TSPAN1    | EHD2      | MAN2A2   |
| ELOVL3    | NYNRIN   | ABHD8     | ABCA3     | ANGEL1   |
| ATP8B2    | MMP11    | CYP2U1    | S100A1    | CDCA3    |
| TNNT1     | CLIP2    | RARG      | SYTL2     | U2AF2    |
| NYAP1     | PLEKHA4  | TSHZ2     | DHX40     | PKD1P1   |
| EEF1A2    | KIF12    | CERK      | P2RX5     | CTNS     |
| MSI1      | PARM1    | FAM102B   | RBP7      | HMGB3    |
| VAT1L     | CNGB1    | EXTL2     | TSPAN15   | ULK3     |
| SUSD3     | HES7     | SAT1      | ZNF512    | SIX2     |
| SHISA8    | MMP17    | FAM69B    | ADD3      | PKP3     |
| CD70      | PIP5KL1  | KCNK6     | CCNYL1    | NOL9     |
| BAI2      | MAOA     | PLA2G16   | TACSTD2   | CDK10    |
| SEPT3     | CILP2    | GABARAPL1 | CYSTM1    | TROAP    |
| PCDH10    | DTX4     | ZNF697    | NUMBL     | SEPHS1   |
| COLEC12   | RNF128   | HCFC1R1   | LAMB2     | CENPN    |
| ANXA8L1   | SNX10    | KIAA1377  | RAB29     | ATP6V0A2 |
| QPCT      | GSTA4    | DYNC2H1   | CD276     | DGKQ     |
| NLGN4X    | MYRF     | ABCC3     | GSN       | KMT2D    |
| MGAT3     | PLEKHH2  | RCAN3     | BAK1      | HYLS1    |
| CYTH4     | SNAP91   | TMEM67    | PERP      | PRMT2    |
| RPRM      | RAB31    | GLDC      | IL1RAP    | EXOC7    |
| FAM134B   | CORO6    | COL7A1    | HLTF      | ARFGAP2  |
| ANPEP     | DCHS2    | ELOVL7    | NME7      | RASSF7   |
| LIPH      | APBB1    | CHN1      | HMHA1     | LRP8     |
| NECAB1    | L3MBTL3  | RGL1      | GLIS2     | CLSPN    |
| ASXL3     | CNRIP1   | CELSR3    | CTTNBP2NL | VPS33A   |
| PALM      | ECHDC3   | FAM184A   | UACA      | BRD9     |
| LRCH2     | STOM     | IFI30     | TWSG1     | SLC7A5   |
| RNF182    | FBXO44   | SLC35G2   | LTA4H     | ZXDC     |
| PDLIM3    | TTC39A   | MPP1      | PCNXL2    | DPP9     |
| TRPV2     | ENTPD8   | IKBIP     | MYO18A    | TSNARE1  |
| RAB39B    | TM6SF1   | LARP6     | DNASE1L1  | BRD1     |
| CELF5     | FGFR4    | POPDC3    | OAZ2      | BRMS1    |
| MLXIPL    | RASSF5   | CDH24     | ERGIC1    | SRCAP    |
| NCCRP1    | ANKRD34A | CHPT1     | VANGL2    | TMED1    |
| NOTCH3    | C11orf45 | TRNP1     | PDP1      | PEF1     |
| EMILIN2   | STEAP2   | PHF21A    | ERRFI1    | DOLPP1   |
| SCN9A     | PLA2G4A  | C1orf115  | IFT46     | MSL3     |
| MFRP      | C15orf48 | RGS10     | ADA       | RIPK1    |
| C1QTNF5   | CDH5     | EML2      | SH3PXD2B  | CRAMP1L  |

|               |              |          |          |               |
|---------------|--------------|----------|----------|---------------|
| FAM153B       | IL1A         | SYDE1    | TMEM25   | FEM1A         |
| CHRM4         | SLC10A4      | ZNF467   | TPCN1    | PBDC1         |
| STON1-GTF2A1L | ADAMTSL4     | FAM132B  | SUMO1    | NOTCH1        |
| SELV          | STX1B        | CNTNAP1  | HSPG2    | ATHL1         |
| NES           | CX3CL1       | MAP7D2   | B4GALT5  | TLR4          |
| GIPR          | THY1         | GPR98    | ACSF2    | PRKAR1B       |
| KRT2          | GLS2         | DNMT3B   | VAT1     | P2RX5-TAX1BP3 |
| NACAD         | NGEF         | MT1A     | NCOA3    | BRPF3         |
| REEP2         | NFATC4       | PROS1    | MGAT5    | LRRK1         |
| LOC113230     | MFI2         | IGFBP6   | ARRB1    | NRP2          |
| KRT72         | TUBA1A       | ST3GAL2  | AHNAK2   | ANAPC2        |
| KRT73         | SEMA3F       | ENPP5    | GRINA    | RRM2          |
| KRT74         | SCN1B        | RRAS2    | RASA1    | FAM57A        |
| KRT71         | LOC100507002 | CDA      | TCIRG1   | TDP1          |
| PCDH20        | TSPAN10      | NRSN2    | IGSF3    | GOLGA3        |
| MAGEL2        | YBX2         | SH3BP1   | C12orf75 | FN3KRP        |
| FSD1          | NDRG4        | CDR2L    | PRDX5    | NUDT15        |
| LOC101929613  | RAMP2        | TRIM46   | UCP2     | GABPA         |
| SRPX2         | COL16A1      | CERS4    | HDAC1    | FAM195B       |
| TNFRSF18      | RECK         | DDX43    | ERO1L    | C9orf69       |
| ITGA1         | ETV1         | CBX6     | SOAT1    | BTBD6         |
| TSPAN7        | IFT81        | DAB2IP   | CLSTN3   | KAT2A         |
| FXYD6         | CCDC181      | BTN3A2   | FHL1     | BAIAP2        |
| RTN4RL2       | ITGA4        | DSE      | ARAP1    | STAG1         |
| SULT2B1       | RAPGEF4      | KIAA1467 | HS2ST1   | PHACTR3       |
| SLC40A1       | SYN2         | DBNDD2   | MTA3     | SMARCB1       |
| HOXD10        | CNTN1        | ROBO1    | FKBP10   | PER1          |
| CYP24A1       | C1orf21      | GGT7     | NIPAL3   | SAMD10        |
| LYPD3         | RBM11        | CBLC     | BCKDK    | SMG9          |
| SYNGR3        | ISG20        | ADD2     | NFKBIA   | CREBBP        |
| KHDRBS2       | GRAMD1C      | POLK     | SLC29A1  | TRMU          |
| ABCG4         | ZIC3         | KIF3C    | TIMP2    | MPDU1         |
| NPY1R         | TMOD2        | KIAA0040 | HIP1R    | ZNF503        |
| CHRFAM7A      | SYT17        | ALPK1    | KDM5B    | CNNM3         |
| SYNGR1        | GATA2        | SIPA1    | FOXO1    | FERMT1        |
| FAM65C        | TMEFF1       | PLS1     | LGALS1   | KAT5          |
| LOC100507387  | HSPA2        | RGS14    | CAPN12   | MAZ           |
| KRT13         | NLRC5        | SGCE     | RNF114   | ALDH16A1      |
| FBN3          | GLIPR2       | ERO1LB   | CIB1     | ARHGAP23      |
| TMEM61        | NRGN         | PGAP1    | SNX9     | SKI           |
| PPM1J         | COL17A1      | ANXA1    | RAB13    | SPR           |
| ELOVL2        | LRFN1        | RCOR2    | HSPA5    | SLC19A1       |
| KCNH2         | SERPINI1     | SEMA7A   | RASAL1   | SP8           |



|           |          |              |                    |          |
|-----------|----------|--------------|--------------------|----------|
| TUBB2B    | RGS9     | RNF24        | RNF11              | HERPUD2  |
| SEMA4A    | KIAA1462 | LITAF        | ITGAV              | AMIGO2   |
| PDZD4     | WNT2B    | CEBPB        | TWF2               | NOC4L    |
| SAMD14    | ACAD11   | WLS          | NBEAL2             | GLUL     |
| CAND2     | TTLL7    | MMD          | RTN3               | KLHL21   |
| CPNE4     | GDPGP1   | ICAM5        | CALU               | PCNT     |
| SPTSSB    | GPNMB    | FAM63A       | COPB1              | HS6ST1   |
| SLC7A8    | WBSCR27  | LIMA1        | USB1               | FAM58A   |
| HPD       | NMNAT2   | HSD17B11     | MTCH1              | TAF6L    |
| ELOVL4    | ATP2C2   | C15orf38     | LMNA               | ZBED2    |
| THSD1     | GPR173   | SIGLEC15     | GAK                | TELO2    |
| AIM1L     | PDE4A    | ITM2C        | MYBBP1A            | PDE1C    |
| TMC8      | SLC35E4  | MRAS         | BLOC1S5-<br>TXNDC5 | PRDM10   |
| TMEM229B  | ARL4D    | ICAM1        | MCM7               | ADCY1    |
| C15orf65  | RRAGD    | LRRC8C       | FAM120A            | KAT6B    |
| CRIP3     | DENND2C  | BSPRY        | HGS                | SAPCD2   |
| CXCL8     | NR4A1    | SEPT6        | CORO1B             | KMT2B    |
| RBM24     | RAB26    | PCYOX1L      | SPON1              | TP73-AS1 |
| VPS37D    | COL9A2   | MTSS1        | VCP                | SUV39H1  |
| SBK2      | MAN1A1   | LRRN4        | PTBP1              | CCDC101  |
| ASAP3     | SDC1     | RIMS2        | BPTF               | AJUBA    |
| FAM155A   | TNS4     | TGFB1I1      | TRIP6              | PLXNA1   |
| SLITRK5   | CD274    | SMAD3        | RPRD2              | INTS10   |
| GRAMD2    | DLL3     | SPSB1        | NUP214             | TMEM18   |
| BEND4     | KANK3    | KCNS3        | VPS51              | MEGF6    |
| SNCA      | C19orf66 | GDAP1        | ABCF2              | TADA2B   |
| BCAS4     | ENO2     | NPHP3-ACAD11 | LEPROT             | D2HGDH   |
| AATK      | GPC2     | ELL2         | POLR2C             | FAM21C   |
| CCDC136   | MIR4260  | MYO5A        | TACC3              | FAM21A   |
| SYN1      | JAZF1    | MICAL1       | SRRM2              | MBD3     |
| NXPH4     | DSC3     | MAP4K2       | POLR3E             | ZNF641   |
| CXorf57   | FBXO2    | L1CAM        | PARP4              | PDCL3    |
| SYT11     | CYBRD1   | STPG1        | UTP20              | C14orf80 |
| APH1B     | ANKRD6   | MFSD6        | TIMM44             | TONSL    |
| LINC00173 | NPL      | OCEL1        | KPNB1              | ARRDC1   |
| GPR37     | ARTN     | SLC16A5      | IFRD2              | OPA3     |
| CDKL2     | MAPRE3   | PRPF40B      | POLR1A             | ADCK3    |
| RTBDN     | SMO      | VIM          | OTUD4              | SLC39A4  |
| CIB2      | NPR1     | TMEM56       | NOC2L              | ESRP2    |
| GPR85     | SLC8B1   | MCAM         | ZPR1               | DUS3L    |
| RIMS3     | GAREML   | DKK3         | MKI67              | RBM23    |
| KCNH3     | DNAH2    | KRT80        | PLEC               | CYTH2    |

|           |           |              |          |           |
|-----------|-----------|--------------|----------|-----------|
| COL4A6    | BASP1     | ITGA5        | SCRIB    | ADAMTS1   |
| GLT8D2    | TNFAIP8   | IRAK2        | MTOR     | NR2F2     |
| NPAS1     | LRRC49    | WDR54        | SETD8    | SLC35C2   |
| KCNV1     | ADAM19    | CD302        | PIEZO1   | MEPCE     |
| BRSK1     | SYPL2     | SLC45A3      | SAP130   | DDX51     |
| SHOX2     | KIAA1324L | LPHN1        | CLPTM1L  | PTPRB     |
| FNDC4     | CXXC5     | PLAUR        | PM20D2   | FOXC1     |
| NKX2-8    | PTPN13    | PGF          | GALE     | LRRC45    |
| RTN2      | PAPL      | IFT80        | C15orf52 | C1orf198  |
| LCN10     | MED12L    | PJA1         | TLE1     | BARX2     |
| SLC13A5   | PBX1      | TRIB1        | GRB10    | SLC52A2   |
| RPRML     | TOX2      | HIVEP2       | ATAD3A   | PHF19     |
| PRRT2     | SDR16C5   | SUFU         | FBXW5    | TRHDE     |
| SYNPO     | FBXL16    | SAT2         | H2AFX    | C17orf70  |
| CA11      | ASIC1     | POLR3GL      | UNG      | RABEP2    |
| P2RY6     | RCN3      | B3GNT2       | POLR2A   | ITFG2     |
| GRHL3     | PLEKHB1   | EMP1         | CFLAR    | ACOX3     |
| SLITRK2   | PACSIN1   | COCH         | HNRNPH1  | MXD4      |
| TMEM240   | SLC29A4   | UGT8         | NUP188   | SLC6A9    |
| TNFRSF11A | ACOXL     | TMEM56-RWDD3 | ZBTB44   | SLC5A6    |
| HAP1      | TRABD2A   | CDH1         | CPSF2    | DNPEP     |
| SEMA3B    | KDEL3     | EGFL7        | LRPAP1   | THBD      |
| KLHDC8B   | KIAA1161  | TNFAIP3      | SETD1A   | KCTD15    |
| PPM1N     | TNFAIP2   | LTBP1        | MARVELD1 | ATF5      |
| HSD17B14  | MATN3     | USP35        | PRKAG1   | IBA57     |
| GMPR      | PCDHB6    | PFKM         | ACTG1    | LINC00941 |
| ZNF385A   | LMO2      | SPARC        | RBM3     | U2AF1L4   |
| RASSF6    | PDZD7     | PAK1         | PFAS     | AP5S1     |
| PLB1      | KRT15     | ST6GALNAC6   | EBNA1BP2 | DPP3      |
| AMZ1      | TMEM45B   | DOCK3        | OBSCN    | TRHDE-AS1 |
| SLC51A    | PLXNB3    | DOCK6        | PTPRK    | KMO       |
| PLAT      | CAMK2N2   | VIM-AS1      | NDOR1    | N4BP2     |
| MLLT11    | BATF3     | CYFIP2       | CAD      | CDAN1     |
| TMCC2     | NXPE3     | CYR61        | FAM166A  | AJAP1     |
| RBM20     | MPP2      | LEPREL1      | PROSER1  | HCFC1     |
| TRPA1     | COL4A5    | PAIP2B       | PCGF3    | PCDH19    |
| FYN       | SNPH      | PCOLCE       | RBM14    | PIGW      |
| A4GALT    | CCDC126   | TC2N         | WDR5     | GUCD1     |
| NAP1L5    | HBEGF     | ZNF217       | POLDIP3  | ADI1      |
| PLA2R1    | HOXD8     | ARNTL        | UBTF     | TAX1BP3   |
| OLFML2A   | LAMB3     | MARCH9       | PHRF1    | MARVELD3  |
| CD14      | HMOX1     | SH2B3        | MISP     | LRRN1     |
| TRPC1     | MTMR11    | DZIP1        | RNH1     | C2orf54   |

|          |           |               |          |              |
|----------|-----------|---------------|----------|--------------|
| NXPH3    | ARHGEF10L | ZP3           | USF2     | ATP10A       |
| MAPK15   | PAQR8     | ATP2B4        | SDCCAG3  | LANCL2       |
| PLEKHG6  | TMEM255A  | B4GALT1       | SURF2    | PLEKHN1      |
| UNC5D    | SGCB      | NME4          | TTF2     | RGS12        |
| LHX9     | FRRS1     | DIXDC1        | UPF1     | ING5         |
| PLAC1    | KCNN4     | PHLDB2        | TCF25    | CDH6         |
| LINGO2   | THEMIS2   | C1GALT1       | GNA11    | FOXQ1        |
| LAT2     | HPSE      | TMEM55A       | PWP2     | PER2         |
| IFFO1    | STXBP1    | PALLD         | ARMC6    | OSGIN1       |
| G0S2     | KLHL13    | LY75-CD302    | TMEM184A | LOC730183    |
| FBLN5    | NAP1L3    | ARHGEF40      | ADRM1    | NOG          |
| PHYHIPL  | FKBP1B    | MSN           | WDR6     | PRDM11       |
| KISS1R   | AGAP2     | CLDN4         | ZMYND19  | FBXL19-AS1   |
| TJP3     | CACNB4    | GLO1          | TEAD4    | ST6GAL2      |
| TMEM45A  | BCORL1    | ABI2          | TMEM115  | FAT3         |
| STON1    | IRF5      | CDH3          | CTBP1    | CA2          |
| NSG1     | LOC729970 | DNAJC25-GNG10 | RECQL4   | ADAMTS15     |
| CCR10    | FCHO1     | GDF11         | PRKRA    | TMEM132B     |
| SECTM1   | RBPM5     | PKIG          | LRRC47   | EDAR         |
| ADAP2    | LMTK3     | PSIP1         | TMEM43   | LOC101929698 |
| GABRB2   | RAB15     | HIP1          | CCDC86   | KRT3         |
| CARNS1   | MPP7      | GNG10         | MCM4     | KRT4         |
| CPT1C    | ANO5      | JUP           | TYSND1   | KRT78        |
| FAM171A2 | GDA       | LAMC2         | MAP2K7   | KRT79        |
| PLIN2    | EPOR      | TM4SF1        | GRWD1    |              |
| PLIN4    | GLRX      | SLC27A1       | MTR      |              |
| SLCO4C1  | FKBP7     | C15orf39      | FLII     |              |
| CSDC2    | LTBP4     | LZTS3         | ATAD3B   |              |
| EFNB3    | MXRA8     | KRT19         | ZC3H18   |              |
| ESPN     | AGAP2-AS1 | TBC1D9        | BDH1     |              |
| USP44    | FA2H      | CSRP1         | SMG5     |              |
| LGI2     | ZNF711    | SLC48A1       | PRICKLE1 |              |
| HOXD11   | PRKACB    | GPR161        | WDR81    |              |
| ANXA6    | TNFSF10   | AKT3          | RPUSD1   |              |
| IQCD     | EML6      | SQRDL         | GCDH     |              |
| RAB6B    | ELOVL6    | LAMA3         | CPSF1    |              |
| PPP4R4   | NTN4      | TBC1D1        | CDCA8    |              |
| C1QTNF1  | ITGB3     | PDLIM1        | RCC2     |              |
| HSPA12A  | PYCARD    | CLDN1         | KEAP1    |              |
| EFNA3    | SHISA4    | ARMCX1        | HECTD1   |              |
| ASGR1    | TTC7B     | FAM50A        | SPAG5    |              |
| ENO3     | HKDC1     | DLG4          | TUBB4B   |              |
| TEX15    | THRA      | DNM1          | FAM20B   |              |

|         |         |           |          |
|---------|---------|-----------|----------|
| VWA1    | DEGS1   | LINC00998 | TMPO     |
| ZNF204P | MAPRE2  | CPNE2     | ECSIT    |
| UBE2L6  | DGKA    | VKORC1    | C9orf114 |
| S100A14 | MOXD1   | TMEM263   | STEAP3   |
| BEX1    | PSD3    | TBC1D31   | C7orf49  |
| PMEL    | CAMK1   | RHOB      | VPRBP    |
| SRPX    | CHCHD10 | SHC1      | TMEM139  |

---

Supplementary Table 6. Ingenuity Pathway Analysis of differentially expressed genes in BRCA1-null compared with BRCA1+ ovarian cancer cells.

| <b>Top Networks</b>                                                            | <b>Score</b>              |                             |
|--------------------------------------------------------------------------------|---------------------------|-----------------------------|
| Cell signaling, nucleic acid metabolism, small molecule biochemistry           | 36                        |                             |
| Cancer, gastrointestinal disease, organismal injury and abnormalities          | 33                        |                             |
| Auditory disease, behavior, cardiovascular disease                             | 32                        |                             |
| Embryonic development, tissue development, developmental disorders             | 31                        |                             |
| Cancer, organismal injury and abnormalities, gastrointestinal disease          | 31                        |                             |
| <b>Molecular and Cellular Function</b>                                         | <b>Molecules</b>          | <b>P-value</b>              |
| Cellular movement                                                              | 702                       | 5.32E-10-1.69E-53           |
| Cellular development                                                           | 995                       | 5.12E-10-4.82E-37           |
| Cellular growth and proliferation                                              | 1057                      | 5.12E-10-8.41E-31           |
| Cell morphology                                                                | 721                       | 5.12E-10-1.70E-30           |
| Cell-to-cell signaling and interactions                                        | 588                       | 3.70E-10-4.82E-30           |
| <b>Top Canonical Pathways</b>                                                  | <b>Overlap (%)</b>        | <b>P-value</b>              |
| Hepatic fibrosis/Hepatic stellate cell activation                              | 36.1                      | 3.07E-16                    |
| Axonal guidance signaling                                                      | 24.4                      | 7.72E-12                    |
| Role of macrophages, fibroblasts and endothelial cells in rheumatoid arthritis | 26.7                      | 3.86E-11                    |
| Role of osteoblasts, osteoclasts and chondrocytes in rheumatoid arthritis      | 26.5                      | 2.00E-08                    |
| Human embryonic stem cell pluripotency                                         | 30.6                      | 3.17E-08                    |
| <b>Top Upstream Regulators</b>                                                 | <b>P-value of overlap</b> | <b>Predicted Activation</b> |
| TNF                                                                            | 2.12E-61                  | Activated                   |
| TGFB1                                                                          | 3.37E-51                  | Activated                   |
| IFGN                                                                           | 1.49E-36                  | Activated                   |
| Beta-estradiol                                                                 | 1.86E-35                  |                             |
| SMARCA4                                                                        | 2.22E-33                  | Activated                   |

Supplementary Table 7. Ingenuity Pathway Analysis of differentially expressed genes in BRCA1-deficient compared with BRCA1-normal ovarian cancer tumors from the TCGA database.

| <b>Top Networks</b>                                                                     | <b>Score</b>              |                   |
|-----------------------------------------------------------------------------------------|---------------------------|-------------------|
| Metabolic Disease, Antigen Presentation, Cell Death and Survival                        | 33                        |                   |
| Auditory Disease, Hereditary Disorder, Neurological Disease                             | 33                        |                   |
| Cancer, Cell-to-Cell Signaling and Interaction, Connective Tissue Disorders             | 30                        |                   |
| Hereditary Disorder, Ophthalmic Disease, Organismal Injury and Abnormalities            | 30                        |                   |
| Post-Translational Modification, Cellular Compromise, Cellular Function and Maintenance | 30                        |                   |
| <b>Molecular and Cellular Function</b>                                                  | <b>Molecules</b>          | <b>P-value</b>    |
| Cellular Growth and Proliferation                                                       | 975                       | 1.61E-03-2.17E-11 |
| Cell Death and Survival                                                                 | 966                       | 2.61E-03-1.11E-09 |
| Cellular Function and Maintenance                                                       | 770                       | 2.56E-03-5.10E-07 |
| Cell-to-Cell Signaling and Interaction                                                  | 324                       | 2.62E-03-9.73E-07 |
| Molecular Transport                                                                     | 574                       | 2.47E-03-1.15E-06 |
| <b>Top Canonical Pathways</b>                                                           | <b>Overlap (%)</b>        | <b>P-value</b>    |
| TREM1 Signaling                                                                         | 41.3                      | 6.21E-08          |
| Antigen Presentation Pathway                                                            | 45.9                      | 1.09E-05          |
| Phagosome Maturation                                                                    | 29.2                      | 9.75E-05          |
| Role of IL-17A in Psoriasis                                                             | 61.5                      | 1.98E-04          |
| Altered T Cell and B Cell Signaling in Rheumatoid Arthritis                             | 30.7                      | 2.37E-04          |
| <b>Top Upstream Regulators</b>                                                          | <b>P-value of overlap</b> |                   |
| HNF4A                                                                                   | 7.45E-19                  |                   |
| TP53                                                                                    | 1.85E-10                  |                   |
| TGFB1                                                                                   | 1.47E-09                  |                   |
| FAS                                                                                     | 7.80E-08                  |                   |
| ESR1                                                                                    | 5.94E-07                  |                   |

Supplementary Table 8. IFN- $\gamma$ -regulated genes that differed in expression between BRCA1-null compared with BRCA1+ UWB1.289 ovarian cancer cells.

| Gene <sup>1</sup> | Gene Expression <sup>2</sup> |                                |
|-------------------|------------------------------|--------------------------------|
|                   | Fold-change                  | Activation status <sup>3</sup> |
| EHF               | 166952.1                     | Inhibited                      |
| <b>OAS2</b>       | 15335509.4                   | Activated                      |
| <b>IFI44</b>      | 178979.6                     | Activated                      |
| <b>FGF2</b>       | 901.4                        | Activated                      |
| <b>DKK1</b>       | 273.7                        | Activated                      |
| <b>ITGA5</b>      | 13947.8                      | Activated                      |
| <b>CD40</b>       | 580.3                        | Activated                      |
| <b>IL1A</b>       | 494.9                        | Activated                      |
| <b>OAS3</b>       | 731.5                        | Activated                      |
| <b>MUC1</b>       | 91.8                         | Activated                      |
| <b>CASP4</b>      | 6.8                          | Activated                      |
| <b>ALDH1A3</b>    | 13.2                         | Activated                      |
| <b>LAMC2</b>      | 128.1                        | Activated                      |
| CAV1              | 28.1                         | Inhibited                      |
| CDH13             | 28.1                         | Inhibited                      |
| <b>IRF9</b>       | 30.3                         | Activated                      |
| <b>APP</b>        | 6.7                          | Activated                      |
| <b>E2F2</b>       | -19.8                        | Activated                      |
| <b>ADORA1</b>     | -19.2                        | Activated                      |
| TRIL              | -63.6                        | Inhibited                      |
| CEBPA             | -1051.8                      | Inhibited                      |
| GDF15             | -18.3                        | Inhibited                      |
| CD14              | -106.5                       | Inhibited                      |
| FBLN1             | -105.7                       | Inhibited                      |
| IL10RA            | -1590.7                      | Inhibited                      |
| <b>FLRT2</b>      | -113047.6                    | Activated                      |
| FLT1              | -15.0                        | Inhibited                      |
| RUNX3             | -348614.5                    | Inhibited                      |
| SERPINA1          | -971.7                       | Inhibited                      |

<sup>1</sup>Activated genes are in bold characters.

<sup>2</sup>Measured by RNAseq.

<sup>3</sup>Determined by IPA.





Supplementary Table 9. Expression (fold-change) of IFN- $\gamma$  pathway genes measured by RNAseq in BRCA1-null and BRCA1+ UWB1-289 ovarian cancer cells treated or untreated with the HDAC inhibitor entinostat. Only genes that changed in at least one of the comparisons below were included.

| Gene   | BRCA1-null vs<br>BRCA1+ | Entinostat-treated <sup>1</sup><br>BRCA1+ vs BRCA1+ | Entinostat-treated <sup>1</sup><br>BRCA1-null vs<br>BRCA1-null |
|--------|-------------------------|-----------------------------------------------------|----------------------------------------------------------------|
| IRF1   | -                       | 6.8                                                 | -                                                              |
| IRF5   | 5.12                    | -                                                   | 5.46                                                           |
| IRF7   | 12.759                  | -5.98                                               | -                                                              |
| IRF9   | 30.297                  | -                                                   | -                                                              |
| SOCS2  | -11.567                 | 2.29                                                | -                                                              |
| IFNGR2 | -                       | 2.1                                                 | -                                                              |

<sup>1</sup>0.5  $\mu$ M entinostat for 24 hours
